# Supplementary material for: p-tert-Butyltetrathiatetramercaptocalix[4]arene as a sulfur-rich platform for molybdenum, tungsten and nickel
Source: Royal Society of Chemistry journal article supplement (doi:10.1039/b816066j), 2008-12-02
Supplement: b816066j.pdf [file b816066j.pdf]

## SUPPORTING INFORMATION

### ***p*-tert-Butyltetrathiatetramercaptocalix[4]arene as a Sulfur-Rich Platform for Molybdenum, Tungsten and Nickel**

Daniela Buccella and Gerard Parkin,\*

*Department of Chemistry,*

*Columbia University,*

*New York, New York 10027, USA.*

---

## EXPERIMENTAL SECTION

### General Considerations

All manipulations were performed using a combination of dry glovebox, high vacuum, and Schlenk techniques under an argon atmosphere unless otherwise specified.<sup>1</sup> Solvents were purified and degassed by standard procedures. <sup>1</sup>H NMR spectra were measured on Bruker 300 DRX, Bruker 400 DRX, and Bruker Avance 500 DMX spectrometers. <sup>1</sup>H chemical shifts are reported in ppm relative to SiMe<sub>4</sub> (δ = 0) and were referenced internally with respect to the protio solvent impurity (δ 7.16 for C<sub>6</sub>D<sub>5</sub>H).<sup>2</sup> <sup>13</sup>C NMR spectra are reported in ppm relative to SiMe<sub>4</sub> (δ = 0) and were referenced internally with respect to the solvent (δ 128.06 for C<sub>6</sub>D<sub>6</sub>).<sup>2</sup> <sup>31</sup>P chemical shifts are reported in ppm relative to 85% H<sub>3</sub>PO<sub>4</sub> (δ = 0) and were referenced using P(OMe)<sub>3</sub> (δ = 141.0) as an external standard. Coupling constants are given in hertz. Infrared spectra were recorded on Nicolet Avatar 370 DTGS spectrometer and are reported in cm<sup>-1</sup>. Mass spectra were obtained on a Micromass Quadrupole-Time-of-Flight mass spectrometer using fast atom bombardment (FAB). Mo(PMe<sub>3</sub>)<sub>6</sub>,<sup>3</sup> W(PMe<sub>3</sub>)<sub>4</sub>(η<sup>2</sup>-CH<sub>2</sub>PMe<sub>2</sub>)H,<sup>4</sup> Ni(PMe<sub>3</sub>)<sub>4</sub>,<sup>5</sup> and [S<sub>4</sub>Calix<sup>Bu<sup>t</sup></sup>(SH)<sub>4</sub>]<sup>6</sup> were prepared by the literature methods or modifications thereof. [S<sub>4</sub>Calix<sup>Bu<sup>t</sup></sup>(SH)<sub>4</sub>] was recrystallized from benzene prior use.

### Synthesis of [S<sub>4</sub>Calix<sup>Bu<sup>t</sup></sup>(SH)<sub>2</sub>(S)<sub>2</sub>]W(PMe<sub>3</sub>)<sub>3</sub>H<sub>2</sub>

A solution of W(PMe<sub>3</sub>)<sub>4</sub>(η<sup>2</sup>-CH<sub>2</sub>PMe<sub>2</sub>)H (72 mg, 0.128 mmol) in benzene (5 mL) was added dropwise, over a period of 30 min, to a solution of [S<sub>4</sub>Calix<sup>Bu<sup>t</sup></sup>(SH)<sub>4</sub>] (100 mg, 0.127 mmol) in benzene (10 mL). The resulting mixture was stirred for 30 min at room temperature. After this period, the solution was concentrated *in vacuo* (to ca. 2 mL) and then lyophilized. The solid obtained was dissolved in benzene (ca. 10 mL) and the solution was passed through a short column of silica gel (1" diameter × 2" height), washing with benzene until the eluate was colorless. The resulting solution was concentrated *in vacuo* (to ca. 2 mL) and then lyophilized to give [S<sub>4</sub>Calix<sup>Bu<sup>t</sup></sup>(SH)<sub>2</sub>(S)<sub>2</sub>]W(PMe<sub>3</sub>)<sub>3</sub>H<sub>2</sub> as a yellow powder (105 mg, 69 %). X-Ray quality

crystals of  $[\text{S}_4\text{Calix}^{\text{Bu}^t}(\text{SH})_2(\text{S})_2]\text{W}(\text{PMe}_3)_3\text{H}_2$  were obtained by slow evaporation of a solution of the compound in benzene.

$^1\text{H}$  NMR data ( $\text{C}_6\text{D}_6$ ): 7.78 [s, 2 aromatic H of  $[\text{S}_4\text{Calix}^{\text{Bu}^t}(\text{SH})_2(\text{S})_2]$ ], 7.68 [overlapping s, 2 aromatic H of  $[\text{S}_4\text{Calix}^{\text{Bu}^t}(\text{SH})_2(\text{S})_2]$ ], 7.68 [d,  $^4J_{\text{HH}} = 2$ , 2 aromatic H of  $[\text{S}_4\text{Calix}^{\text{Bu}^t}(\text{SH})_2(\text{S})_2]$ ], 7.65 [d,  $^4J_{\text{HH}} = 2$ , 2 aromatic H of  $[\text{S}_4\text{Calix}^{\text{Bu}^t}(\text{SH})_2(\text{S})_2]$ ], 6.41 [s, 2 H of  $[\text{S}_4\text{Calix}^{\text{Bu}^t}(\text{SH})_2(\text{S})_2]$ ], 1.44 [d,  $^2J_{\text{HP}} = 8$ , 9 H of  $\text{W}(\text{PMe}_3)_3$ ], 1.22 [m, 18 H of  $\text{W}(\text{PMe}_3)_3$ ], 1.20 [s, 18 H of 2  $\text{Bu}^t$  of  $[\text{S}_4\text{Calix}^{\text{Bu}^t}(\text{SH})_2(\text{S})_2]$ ], 1.11 [s, 18 H of 2  $\text{Bu}^t$  of  $[\text{S}_4\text{Calix}^{\text{Bu}^t}(\text{SH})_2(\text{S})_2]$ ], -3.2 to -3.8 [m, 2 WH].  $^{31}\text{P}$  NMR ( $\text{C}_6\text{D}_6$ ): -23.76 [broad m, 1 P of  $\text{W}(\text{PMe}_3)_3$ ], -31.46 [d,  $^2J_{\text{PP}} = 17$   $^1J_{\text{PW}} = 146$ , 2 P of  $\text{W}(\text{PMe}_3)_3$ ].  $^{13}\text{C}\{^1\text{H}\}$  NMR ( $\text{C}_6\text{D}_6$ ): 146.5 [s, 2 aromatic C of  $[\text{S}_4\text{Calix}^{\text{Bu}^t}(\text{SH})_2(\text{S})_2]$ ], 145.4 [s, 2 aromatic C of  $[\text{S}_4\text{Calix}^{\text{Bu}^t}(\text{SH})_2(\text{S})_2]$ ], 136.3 [s, 2 aromatic C of  $[\text{S}_4\text{Calix}^{\text{Bu}^t}(\text{SH})_2(\text{S})_2]$ ], 135.7 [s, 2 aromatic C of  $[\text{S}_4\text{Calix}^{\text{Bu}^t}(\text{SH})_2(\text{S})_2]$ ], 133.8 [s, 2 aromatic C of  $[\text{S}_4\text{Calix}^{\text{Bu}^t}(\text{SH})_2(\text{S})_2]$ ], 133.2 [s, 2 aromatic C of  $[\text{S}_4\text{Calix}^{\text{Bu}^t}(\text{SH})_2(\text{S})_2]$ ], 132.5 [s, 2 aromatic C of  $[\text{S}_4\text{Calix}^{\text{Bu}^t}(\text{SH})_2(\text{S})_2]$ ], 132.1 [s, 2 aromatic C of  $[\text{S}_4\text{Calix}^{\text{Bu}^t}(\text{SH})_2(\text{S})_2]$ ], 129.0 [broad, overlapping solvent, remaining aromatic C of  $[\text{S}_4\text{Calix}^{\text{Bu}^t}(\text{SH})_2(\text{S})_2]$ ], 34.3 [s, 2  $\text{C}(\text{CH}_3)_3$  of  $[\text{S}_4\text{Calix}^{\text{Bu}^t}(\text{SH})_2(\text{S})_2]$ ], 34.2 [s, 2  $\text{C}(\text{CH}_3)_3$  of  $[\text{S}_4\text{Calix}^{\text{Bu}^t}(\text{SH})_2(\text{S})_2]$ ], 31.5 [s, 6  $\text{C}(\text{CH}_3)_3$  of  $[\text{S}_4\text{Calix}^{\text{Bu}^t}(\text{SH})_2(\text{S})_2]$ ], 31.3 [s, 6  $\text{C}(\text{CH}_3)_3$  of  $[\text{S}_4\text{Calix}^{\text{Bu}^t}(\text{SH})_2(\text{S})_2]$ ], 24.5 [m, 6 C of  $\text{P}(\text{CH}_3)_3$ ], 24.5 [d,  $^2J_{\text{CP}} = 14$ , 3 C of  $\text{P}(\text{CH}_3)_3$ ]. Mass Spectrum (FAB+):  $m/z = 1195.53$  {M-1}. Anal. Calcd. For  $[\text{S}_4\text{Calix}^{\text{Bu}^t}(\text{SH})_2(\text{S})_2]\text{W}(\text{PMe}_3)_3\text{H}_2 \cdot 0.5(\text{C}_6\text{H}_6)$ : C, 50.5 %, H, 6.4 %. Found: C, 50.2 %, H, 6.1 %.

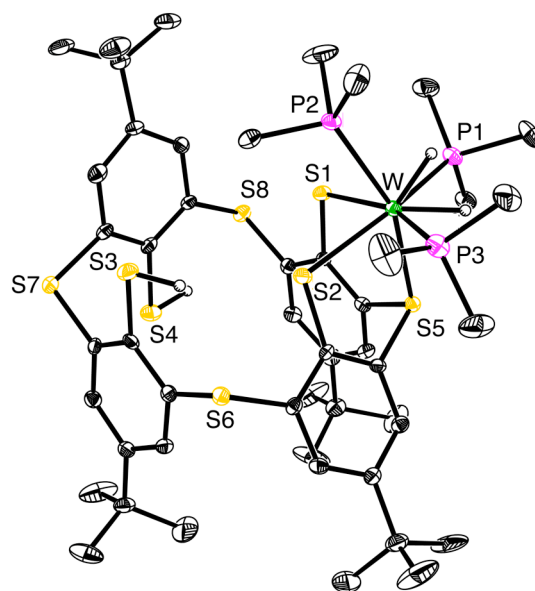

*Molecular structure of [S<sub>4</sub>Calix<sup>But</sup>(SH)<sub>2</sub>(S)<sub>2</sub>]W(PMe<sub>3</sub>)<sub>3</sub>H<sub>2</sub>  
 (20 % thermal parameters)*

### Synthesis of *syn*- and *anti*-{[S<sub>4</sub>Calix<sup>But</sup>(S)<sub>4</sub>]}[W(PMe<sub>3</sub>)<sub>3</sub>H<sub>2</sub>]<sub>2</sub>

W(PMe<sub>3</sub>)<sub>4</sub>(η<sup>2</sup>-CH<sub>2</sub>PMe<sub>2</sub>)H (44 mg, 0.078 mmol) was added to a solution of [S<sub>4</sub>Calix<sup>But</sup>(SH)<sub>4</sub>] (30 mg, 0.038 mmol) in benzene (2 mL). The mixture was stirred for 20 min and then allowed to stand at room temperature for 18 h. After this period, yellow-orange crystals of pure *anti*-{[S<sub>4</sub>Calix<sup>But</sup>(S)<sub>4</sub>]}[W(PMe<sub>3</sub>)<sub>3</sub>H<sub>2</sub>]<sub>2</sub> (22 mg, 36 %) were collected from the reaction mixture by filtration. The filtrate was lyophilized and the residue obtained was washed with cold pentane (2 × 1 mL) and dried *in vacuo* to give *syn*-{[S<sub>4</sub>Calix<sup>But</sup>(S)<sub>4</sub>]}[W(PMe<sub>3</sub>)<sub>3</sub>H<sub>2</sub>]<sub>2</sub> as a yellow powder (24 mg, 39 %). X-ray quality crystals of *anti*-{[S<sub>4</sub>Calix<sup>But</sup>(S)<sub>4</sub>]}[W(PMe<sub>3</sub>)<sub>3</sub>H<sub>2</sub>]<sub>2</sub> were obtained directly from the reaction mixture, while X-ray quality crystals of *syn*-{[S<sub>4</sub>Calix<sup>But</sup>(S)<sub>4</sub>]}[W(PMe<sub>3</sub>)<sub>3</sub>H<sub>2</sub>]<sub>2</sub> were obtained by slow evaporation of a solution of the compound in benzene. Monitoring the reaction by <sup>1</sup>H NMR spectroscopy indicates that the *syn* and *anti* isomers of {[S<sub>4</sub>Calix<sup>But</sup>(S)<sub>4</sub>]}[W(PMe<sub>3</sub>)<sub>3</sub>H<sub>2</sub>]<sub>2</sub> are formed in a *ca.* 1:1 ratio.

Characterization of *anti*-{[S<sub>4</sub>Calix<sup>Bu<sup>t</sup></sup>(S)<sub>4</sub>]}[W(PMe<sub>3</sub>)<sub>3</sub>H<sub>2</sub>]<sub>2</sub>: <sup>1</sup>H NMR data (C<sub>6</sub>D<sub>6</sub>): 7.82 [m, 8 aromatic H of [S<sub>4</sub>Calix<sup>Bu<sup>t</sup></sup>(S)<sub>4</sub>]], 1.37 [s, 36 H of 4 Bu<sup>t</sup> of [S<sub>4</sub>Calix<sup>Bu<sup>t</sup></sup>(S)<sub>4</sub>]], 1.30 [m, 36 H of W(PMe<sub>3</sub>)], 1.20 [d, <sup>2</sup>J<sub>HP</sub> = 8, 18 H of W(PMe<sub>3</sub>)], -3.0 to -4.0 [m, 4 WH]. <sup>31</sup>P{<sup>1</sup>H} NMR (C<sub>6</sub>D<sub>6</sub>): -20.60 [t, <sup>2</sup>J<sub>PP</sub> = 20, <sup>1</sup>J<sub>PW</sub> = 234, 2 P of W(PMe<sub>3</sub>)<sub>3</sub>], -33.26 [d, <sup>2</sup>J<sub>PP</sub> = 20, <sup>1</sup>J<sub>PW</sub> = 163, 4 P of W(PMe<sub>3</sub>)<sub>3</sub>]. IR (KBr disc, cm<sup>-1</sup>): 2963 (s), 2903 (s), 2868 (m), 2804 (w), 1848 (m), 1572 (w), 1504 (w), 1477 (m), 1462 (w), 1421 (m), 1400 (s), 1375 (m), 1360 (w), 1295 (m), 1276 (s), 1260 (s), 1199 (w), 1184 (w), 1147 (m), 1040 (m), 960 (s), 943 (s), 884 (w), 873 (w), 856 (m), 790 (w), 783 (w), 714 (s), 677 (s), 666 (s), 626 (w), 609 (w). Anal. Calcd. For [S<sub>4</sub>Calix<sup>Bu<sup>t</sup></sup>(S)<sub>4</sub>][W(PMe<sub>3</sub>)<sub>3</sub>H<sub>2</sub>]<sub>2</sub>: C, 43.3 %, H, 6.4 %. Found: C, 43.3 %, H, 6.3 %.

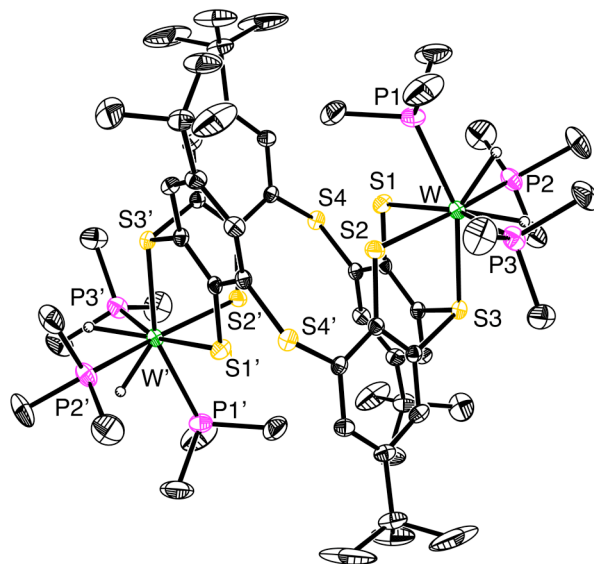

*Molecular structure of anti*-{[S<sub>4</sub>Calix<sup>Bu<sup>t</sup></sup>(S)<sub>4</sub>]}[W(PMe<sub>3</sub>)<sub>3</sub>H<sub>2</sub>]<sub>2</sub>. The molecule exhibits crystallographic inversion symmetry.

(20 % thermal parameters)

Characterization of *syn*-{[S<sub>4</sub>Calix<sup>Bu<sup>t</sup></sup>(S)<sub>4</sub>]}[W(PMe<sub>3</sub>)<sub>3</sub>H<sub>2</sub>]<sub>2</sub>: <sup>1</sup>H NMR data (C<sub>6</sub>D<sub>6</sub>): 7.54 [d, <sup>4</sup>J<sub>HH</sub> = 2, 4 aromatic H of [S<sub>4</sub>Calix<sup>Bu<sup>t</sup></sup>(S)<sub>4</sub>]], 7.45 [d, <sup>4</sup>J<sub>HH</sub> = 2, 4 aromatic H of [S<sub>4</sub>Calix<sup>Bu<sup>t</sup></sup>(S)<sub>4</sub>]], 1.73 [d, <sup>2</sup>J<sub>HP</sub> = 8, 18 H of W(PMe<sub>3</sub>)], 1.29 [m, 36 H of W(PMe<sub>3</sub>)], 1.22 [s, 36 H of 4 Bu<sup>t</sup> of [S<sub>4</sub>Calix<sup>Bu<sup>t</sup></sup>(S)<sub>4</sub>]], -3.1 to -3.9 [m, 4 WH]. <sup>31</sup>P{<sup>1</sup>H} NMR (C<sub>6</sub>D<sub>6</sub>): -26.50 [t, <sup>2</sup>J<sub>PP</sub> = 14, <sup>1</sup>J<sub>PW</sub> = 235, 2 P of W(PMe<sub>3</sub>)<sub>3</sub>], -33.18 [d, <sup>2</sup>J<sub>PP</sub> = 14, <sup>1</sup>J<sub>PW</sub> = 148, 4 P of W(PMe<sub>3</sub>)<sub>3</sub>]. <sup>13</sup>C{<sup>1</sup>H} NMR (C<sub>6</sub>D<sub>6</sub>):

157.2 [d,  $^3J_{\text{CP}} = 10$ , 4 aromatic C of  $[\text{S}_4\text{Calix}^{\text{Bu}^t}(\text{S})_4]$ ], 143.4 [s, 4 aromatic C of  $[\text{S}_4\text{Calix}^{\text{Bu}^t}(\text{S})_4]$ ], 142.7 [s, 4 aromatic C of  $[\text{S}_4\text{Calix}^{\text{Bu}^t}(\text{S})_4]$ ], 138.9 [s, 4 aromatic C of  $[\text{S}_4\text{Calix}^{\text{Bu}^t}(\text{S})_4]$ ], 132.1 [s, 4 aromatic C of  $[\text{S}_4\text{Calix}^{\text{Bu}^t}(\text{S})_4]$ ], 34.1 [s, 4  $\underline{\text{C}}(\text{CH}_3)_3$  of  $[\text{S}_4\text{Calix}^{\text{Bu}^t}(\text{S})_4]$ ], 31.8 [s, 12  $\underline{\text{C}}(\text{CH}_3)_3$  of  $[\text{S}_4\text{Calix}^{\text{Bu}^t}(\text{S})_4]$ ], 24.8 [m, 18 C of  $\text{P}(\underline{\text{C}}\text{H}_3)_3$ ], one aromatic signal obscured by solvent. IR (KBr disc,  $\text{cm}^{-1}$ ): 2963 (s), 2904 (s), 2868 (m), 2801 (w), 1913 (w), 1856 (m), 1574 (w), 1477 (m), 1462 (w), 1421 (m), 1401 (m), 1374 (m), 1360 (w), 1295 (m), 1279 (m), 1259 (s), 1191 (w), 1148 (w), 1139 (w), 1042 (m), 962 (s), 942 (s), 880 (w), 853 (m), 782 (w), 712 (s), 667 (s).

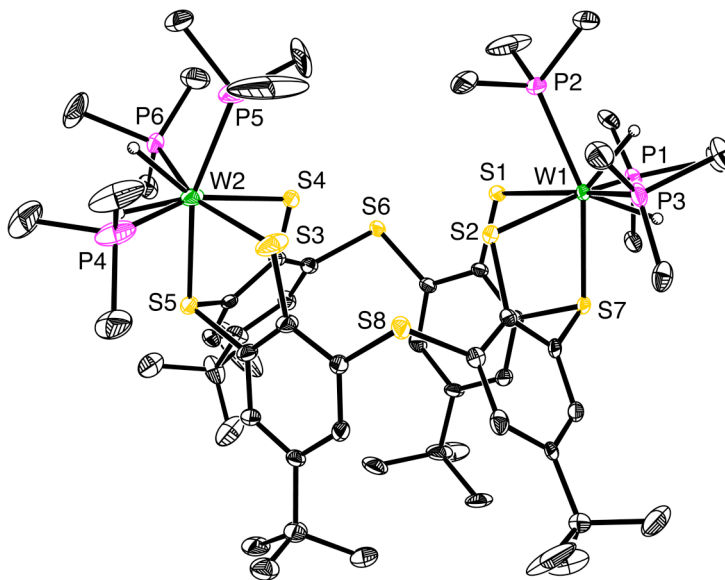

*Molecular structure of  $\text{syn-}[\text{S}_4\text{Calix}^{\text{Bu}^t}(\text{S})_4][\text{W}(\text{PMe}_3)_3\text{H}_2]_2$   
 (30 % thermal parameters)*

### Synthesis of $[\text{S}_4\text{Calix}^{\text{Bu}^t}(\text{SH})_2(\text{S})_2]\text{Mo}(\text{PMe}_3)_3$

A mixture of  $\text{Mo}(\text{PMe}_3)_6$  (70 mg, 0.127 mmol) and  $[\text{S}_4\text{Calix}^{\text{Bu}^t}(\text{SH})_4]$  (100 mg, 0.127 mmol) was treated with benzene (5 mL) and stirred at room temperature for 18 h. The solution was then degassed by a freeze-pump-thaw cycle, and stirring was continued at room temperature. The procedure was repeated periodically until no more hydrogen evolution was detected (after approx. 36 h). After this period, the volatile components were removed by lyophilization, and the resulting solid was washed with cold pentane

(2 × 1 mL) and dried *in vacuo* to give  $[S_4\text{Calix}^{\text{Bu}^t}(\text{SH})_2(\text{S})_2]\text{Mo}(\text{PMe}_3)_3$  as a purple solid (103 mg, 73 %). Crystals of  $[S_4\text{Calix}^{\text{Bu}^t}(\text{SH})_2(\text{S})_2]\text{Mo}(\text{PMe}_3)_3$  suitable for X-ray diffraction analysis were obtained from hexane at  $-20^\circ\text{C}$ .  $^1\text{H}$  NMR data ( $\text{C}_6\text{D}_6$ ): 8.16 [s, 2 aromatic H of  $[S_4\text{Calix}^{\text{Bu}^t}(\text{SH})_2(\text{S})_2]$ ], 7.90 [s, 4 aromatic H of  $[S_4\text{Calix}^{\text{Bu}^t}(\text{SH})_2(\text{S})_2]$ ], 7.70 [s, 2 aromatic H of  $[S_4\text{Calix}^{\text{Bu}^t}(\text{SH})_2(\text{S})_2]$ ], 1.36 [broad d,  $^2J_{\text{HP}} = 5$ , 9 H of  $\text{Mo}(\text{PMe}_3)_3$ ], 1.24 [s, 18 H of 2  $\text{Bu}^t$   $[S_4\text{Calix}^{\text{Bu}^t}(\text{SH})_2(\text{S})_2]$ ], 1.14 [s, 18 H of 2  $\text{Bu}^t$   $[S_4\text{Calix}^{\text{Bu}^t}(\text{SH})_2(\text{S})_2]$ ], 0.99 [m, 18 H of  $\text{Mo}(\text{PMe}_3)_3$ ].  $^{31}\text{P}\{^1\text{H}\}$  NMR ( $\text{C}_6\text{D}_6$ ): -24.7 [broad s, 3 P of  $\text{Mo}(\text{PMe}_3)_3$ ].  $^{13}\text{C}\{^1\text{H}\}$  NMR ( $\text{C}_6\text{D}_6$ ): 147.2 [s, 2 aromatic C of  $[S_4\text{Calix}^{\text{Bu}^t}(\text{SH})_2(\text{S})_2]$ ], 147.1 [s, 2 aromatic C of  $[S_4\text{Calix}^{\text{Bu}^t}(\text{SH})_2(\text{S})_2]$ ], 135.6 [s, 2 aromatic C of  $[S_4\text{Calix}^{\text{Bu}^t}(\text{SH})_2(\text{S})_2]$ ], 135.1 [s, 2 aromatic C of  $[S_4\text{Calix}^{\text{Bu}^t}(\text{SH})_2(\text{S})_2]$ ], 134.6 [s, 2 aromatic C of  $[S_4\text{Calix}^{\text{Bu}^t}(\text{SH})_2(\text{S})_2]$ ], 133.5 [s, 2 aromatic C of  $[S_4\text{Calix}^{\text{Bu}^t}(\text{SH})_2(\text{S})_2]$ ], 132.7 [s, 2 aromatic C of  $[S_4\text{Calix}^{\text{Bu}^t}(\text{SH})_2(\text{S})_2]$ ], 129.1 [s, 2 aromatic C of  $[S_4\text{Calix}^{\text{Bu}^t}(\text{SH})_2(\text{S})_2]$ ], 34.4 [s, 2  $\text{C}(\text{CH}_3)_3$  of  $[S_4\text{Calix}^{\text{Bu}^t}(\text{SH})_2(\text{S})_2]$ ], 34.3 [s, 2  $\text{C}(\text{CH}_3)_3$  of  $[S_4\text{Calix}^{\text{Bu}^t}(\text{SH})_2(\text{S})_2]$ ], 31.5 [overlapping m, 9 C of  $\text{P}(\text{CH}_3)_3$ ], 31.5 [s, 6  $\text{C}(\text{CH}_3)_3$  of  $[S_4\text{Calix}^{\text{Bu}^t}(\text{SH})_2(\text{S})_2]$ ], 31.3 [s, 6  $\text{C}(\text{CH}_3)_3$  of  $[S_4\text{Calix}^{\text{Bu}^t}(\text{SH})_2(\text{S})_2]$ ], four aromatic signals not observed.

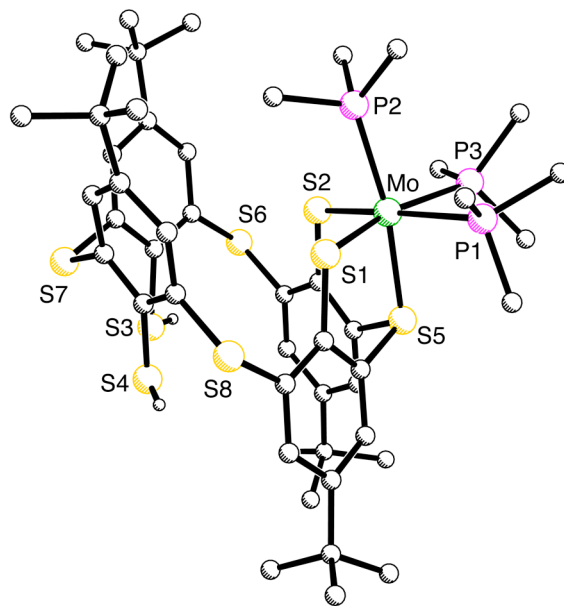

*Molecular structure of  $[S_4\text{Calix}^{\text{Bu}^t}(\text{SH})_2(\text{S})_2]\text{Mo}(\text{PMe}_3)_3$*

## Determination of the equilibrium constant for oxidative addition of H<sub>2</sub> to

### [S<sub>4</sub>Calix<sup>Bu<sup>t</sup></sup>(SH)<sub>2</sub>(S)<sub>2</sub>]Mo(PMe<sub>3</sub>)<sub>3</sub>.

A solution of [S<sub>4</sub>Calix<sup>Bu<sup>t</sup></sup>(SH)<sub>2</sub>(S)<sub>2</sub>]Mo(PMe<sub>3</sub>)<sub>3</sub> (10 mg, 0.009 mmol) in C<sub>6</sub>D<sub>6</sub> (600 μL) in an NMR tube equipped with a J.Young valve was degassed and treated with H<sub>2</sub> (1 atm). The mixture was allowed to stand at room temperature and was monitored by <sup>1</sup>H NMR spectroscopy, thereby indicating that equilibration with [S<sub>4</sub>Calix<sup>Bu<sup>t</sup></sup>(SH)<sub>2</sub>(S)<sub>2</sub>]Mo(PMe<sub>3</sub>)<sub>3</sub>H<sub>2</sub> was attained over a period of 3 days. The ratio of the [S<sub>4</sub>Calix<sup>Bu<sup>t</sup></sup>(SH)<sub>2</sub>(S)<sub>2</sub>]Mo(PMe<sub>3</sub>)<sub>3</sub>H<sub>2</sub> and [S<sub>4</sub>Calix<sup>Bu<sup>t</sup></sup>(SH)<sub>2</sub>(S)<sub>2</sub>]Mo(PMe<sub>3</sub>)<sub>3</sub> in solution was established by integration of the aromatic signals in the <sup>1</sup>H NMR spectrum. The equilibrium constant, 1.1 × 10<sup>3</sup> M<sup>-1</sup> was calculated using a concentration of H<sub>2</sub> in benzene of 2.914 × 10<sup>-3</sup> M.<sup>7</sup> <sup>1</sup>H NMR data for [S<sub>4</sub>Calix<sup>Bu<sup>t</sup></sup>(SH)<sub>2</sub>(S)<sub>2</sub>]Mo(PMe<sub>3</sub>)<sub>3</sub>H<sub>2</sub> (C<sub>6</sub>D<sub>6</sub>): 7.75 [s, 2 aromatic H of [S<sub>4</sub>Calix<sup>Bu<sup>t</sup></sup>(SH)<sub>2</sub>(S)<sub>2</sub>]], 7.68 [d, <sup>4</sup>J<sub>HH</sub> = 2, 2 aromatic H of [S<sub>4</sub>Calix<sup>Bu<sup>t</sup></sup>(SH)<sub>2</sub>(S)<sub>2</sub>]], 7.65 [overlapping s, 2 aromatic H of [S<sub>4</sub>Calix<sup>Bu<sup>t</sup></sup>(SH)<sub>2</sub>(S)<sub>2</sub>]], 7.65 [d, <sup>4</sup>J<sub>HH</sub> = 2, 2 aromatic H of [S<sub>4</sub>Calix<sup>Bu<sup>t</sup></sup>(SH)<sub>2</sub>(S)<sub>2</sub>]], 6.59 [s, 2 H of [S<sub>4</sub>Calix<sup>Bu<sup>t</sup></sup>(SH)<sub>2</sub>(S)<sub>2</sub>]], 1.29 [d, <sup>2</sup>J<sub>HP</sub> = 7, 9 H of Mo(PMe<sub>3</sub>)], 1.19 [s, 18 H of 2 Bu<sup>t</sup> of [S<sub>4</sub>Calix<sup>Bu<sup>t</sup></sup>(SH)<sub>2</sub>(S)<sub>2</sub>]], 1.10 [s, 18 H of 2 Bu<sup>t</sup> of [S<sub>4</sub>Calix<sup>Bu<sup>t</sup></sup>(SH)<sub>2</sub>(S)<sub>2</sub>]], 1.08 [m, 18 H of Mo(PMe<sub>3</sub>)], -3.7 to -6.2 [very broad m, 2 MoH]. <sup>31</sup>P NMR (C<sub>6</sub>D<sub>6</sub>): 3.56 [broad m, 1 P of Mo(PMe<sub>3</sub>)<sub>3</sub>], 1.42 [d, <sup>2</sup>J<sub>PP</sub> = 24, 2 P of Mo(PMe<sub>3</sub>)<sub>3</sub>].

### Synthesis of [S<sub>4</sub>Calix<sup>Bu<sup>t</sup></sup>(S)<sub>4</sub>][Ni(PMe<sub>3</sub>)<sub>2</sub>]

A solution of Ni(PMe<sub>3</sub>)<sub>4</sub> (71 mg, 0.196 mmol) in benzene (3 mL) was added to a solution of [S<sub>4</sub>Calix<sup>Bu<sup>t</sup></sup>(SH)<sub>4</sub>] (75 mg, 0.096 mmol) in benzene (8 mL). The resulting solution was stirred for 20 min, and then allowed to stand at room temperature for 12 h. After this period the mixture was concentrated *in vacuo* to half the volume. The solid was collected by filtration, washed with pentane (2×3 mL) and dried *in vacuo*, to give [S<sub>4</sub>Calix<sup>Bu<sup>t</sup></sup>(S)<sub>4</sub>][Ni(PMe<sub>3</sub>)<sub>2</sub>] as red crystals (72 mg, 71 %). X-Ray quality crystals of [S<sub>4</sub>Calix<sup>Bu<sup>t</sup></sup>(S)<sub>4</sub>][Ni(PMe<sub>3</sub>)<sub>2</sub>] were obtained by slow cooling of a solution in hot benzene. <sup>1</sup>H NMR data (C<sub>6</sub>D<sub>6</sub>): 7.85 [d, <sup>4</sup>J<sub>HH</sub> = 1.8, 2 aromatic H of [S<sub>4</sub>Calix<sup>Bu<sup>t</sup></sup>(S)<sub>4</sub>]], 7.42 [broad s, 2



aromatic H of  $[S_4\text{Calix}^{\text{Bu}^t}(\text{S})_4]$ , 1.17 [s, 36 H of 4  $\text{Bu}^t$  of  $[S_4\text{Calix}^{\text{Bu}^t}(\text{S})_4]$ ], 0.70 [d,  $^2J_{\text{HP}} = 11$ , 18 H of 2 of  $\text{Ni}(\text{PMe}_3)$ ].  $^{31}\text{P}\{^1\text{H}\}$  NMR ( $\text{C}_6\text{D}_6$ ): -6.95 [s, 2 P of  $\text{Ni}(\text{PMe}_3)$ ]. Mass Spectrum (FAB+):  $m/z = 1050.4$  {M}. IR (KBr disc,  $\text{cm}^{-1}$ ): 2961 (s), 2904 (m), 2868 (m), 1572 (m), 1504 (w), 1477 (m), 1463 (m), 1401 (s), 1377 (m), 1361 (m), 1304 (w), 1284 (m), 1258 (s), 1190 (w), 1147 (m), 1059 (w), 1038 (m), 955 (s), 882 (m), 871 (m), 851 (w), 787 (w), 749 (w), 740 (w), 710 (m), 679 (m), 657 (w), 626 (w), 561 (m), 512 (w), 501 (m), 471 (w). Anal. Calcd. For  $[S_4\text{Calix}^{\text{Bu}^t}(\text{S})_4][\text{Ni}(\text{PMe}_3)_2] \cdot (\text{C}_6\text{H}_6)$ : C, 55.32 %, H, 6.07 %. Found: C, 55.32 %, H, 6.14 %.

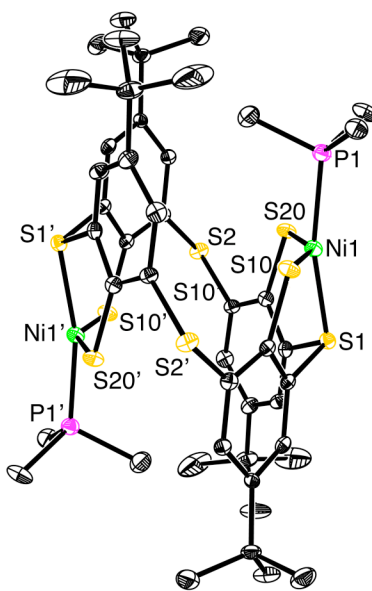

*Molecular structure of  $[S_4\text{Calix}^{\text{Bu}^t}(\text{S})_2][\text{Ni}(\text{PMe}_3)_2]$ . The molecule exhibits crystallographic inversion symmetry.*

*(20 % thermal parameters)*

### X-ray structure determinations

X-ray diffraction data were collected on either a Bruker Apex II diffractometer or a Bruker P4 diffractometer equipped with a SMART CCD detector. Crystal data, data collection and refinement parameters are summarized in Table 1. The structures were

solved using direct methods and standard difference map techniques, and were refined by full-matrix least-squares procedures on  $F^2$  with SHELXTL (Version 6.1).<sup>8</sup>

**Table 1.** Crystal, intensity collection and refinement data.

|                                          | $[(S_4\text{Calix}^{\text{Bu}^t}(\text{SH})_2(\text{S})_2)]-$<br>$W(\text{PMe}_3)_3\text{H}_2 \cdot (\text{C}_6\text{H}_6)$ | <i>anti</i> - $[(S_4\text{Calix}^{\text{Bu}^t}(\text{S})_4)]-$<br>$[W(\text{PMe}_3)_3\text{H}_2]_2 \cdot 2(\text{C}_6\text{H}_6)$ |
|------------------------------------------|-----------------------------------------------------------------------------------------------------------------------------|-----------------------------------------------------------------------------------------------------------------------------------|
| lattice                                  | Triclinic                                                                                                                   | Triclinic                                                                                                                         |
| formula                                  | $\text{C}_{55}\text{H}_{81}\text{P}_3\text{S}_8\text{W}$                                                                    | $\text{C}_{70}\text{H}_{114}\text{P}_6\text{S}_8\text{W}_2$                                                                       |
| formula weight                           | 1275.44                                                                                                                     | 1765.61                                                                                                                           |
| space group                              | <i>P</i> -1                                                                                                                 | <i>P</i> -1                                                                                                                       |
| <i>a</i> /Å                              | 14.3750(6)                                                                                                                  | 12.5194(9)                                                                                                                        |
| <i>b</i> /Å                              | 14.9573(7)                                                                                                                  | 12.5419(9)                                                                                                                        |
| <i>c</i> /Å                              | 15.3607(8)                                                                                                                  | 15.1273(10)                                                                                                                       |
| $\alpha$ /°                              | 89.2720(10)                                                                                                                 | 67.232(2)                                                                                                                         |
| $\beta$ /°                               | 75.8420(10)                                                                                                                 | 77.1440(10)                                                                                                                       |
| $\gamma$ /°                              | 76.8000(10)                                                                                                                 | 79.1250(10)                                                                                                                       |
| <i>V</i> /Å <sup>3</sup>                 | 3114.5(3)                                                                                                                   | 2121.3(3)                                                                                                                         |
| <i>Z</i>                                 | 2                                                                                                                           | 1                                                                                                                                 |
| temperature (K)                          | 243                                                                                                                         | 243                                                                                                                               |
| radiation ( $\lambda$ , Å)               | 0.71073                                                                                                                     | 0.71073                                                                                                                           |
| $\rho$ (calcd.), g cm <sup>-3</sup>      | 1.360                                                                                                                       | 1.382                                                                                                                             |
| $\mu$ (Mo K $\alpha$ ), mm <sup>-1</sup> | 2.233                                                                                                                       | 3.054                                                                                                                             |
| $\theta$ max, deg.                       | 28.28                                                                                                                       | 28.27                                                                                                                             |
| no. of data                              | 14001                                                                                                                       | 9434                                                                                                                              |
| no. of parameters                        | 636                                                                                                                         | 412                                                                                                                               |
| $R_1 [I > 2\sigma(I)]$                   | 0.0507                                                                                                                      | 0.0432                                                                                                                            |
| $wR_2 [I > 2\sigma(I)]$                  | 0.0650                                                                                                                      | 0.0797                                                                                                                            |
| GOF                                      | 1.031                                                                                                                       | 1.032                                                                                                                             |

**Table 1.** Crystal, intensity collection and refinement data (continued)

|                                                              | <i>syn</i> -[(S <sub>4</sub> Calix <sup>Bu<sup>t</sup></sup> (S) <sub>4</sub> ]-<br>[W(PMe <sub>3</sub> ) <sub>3</sub> H <sub>2</sub> ] <sub>2</sub> ·(C <sub>6</sub> H <sub>6</sub> ) | [(S <sub>4</sub> Calix <sup>Bu<sup>t</sup></sup> (S) <sub>4</sub> ]-<br>[Ni(PMe <sub>3</sub> ) <sub>2</sub> ] <sub>2</sub> ·2(C <sub>6</sub> H <sub>6</sub> ) |
|--------------------------------------------------------------|----------------------------------------------------------------------------------------------------------------------------------------------------------------------------------------|---------------------------------------------------------------------------------------------------------------------------------------------------------------|
| lattice                                                      | Monoclinic                                                                                                                                                                             | Triclinic                                                                                                                                                     |
| formula                                                      | C <sub>64</sub> H <sub>108</sub> P <sub>6</sub> S <sub>8</sub> W <sub>2</sub>                                                                                                          | C <sub>58</sub> H <sub>74</sub> Ni <sub>2</sub> P <sub>2</sub> S <sub>8</sub>                                                                                 |
| formula weight                                               | 1687.50                                                                                                                                                                                | 1207.01                                                                                                                                                       |
| space group                                                  | <i>P</i> 2 <sub>1</sub> / <i>n</i>                                                                                                                                                     | <i>P</i> -1                                                                                                                                                   |
| <i>a</i> /Å                                                  | 16.5666(18)                                                                                                                                                                            | 12.0009(7)                                                                                                                                                    |
| <i>b</i> /Å                                                  | 19.595(2)                                                                                                                                                                              | 16.9077(11)                                                                                                                                                   |
| <i>c</i> /Å                                                  | 23.604(3)                                                                                                                                                                              | 17.2253(12)                                                                                                                                                   |
| $\alpha$ /°                                                  | 90.00                                                                                                                                                                                  | 107.1050(10)                                                                                                                                                  |
| $\beta$ /°                                                   | 96.152(2)                                                                                                                                                                              | 103.4440(10)                                                                                                                                                  |
| $\gamma$ /°                                                  | 90.00                                                                                                                                                                                  | 103.6220(10)                                                                                                                                                  |
| <i>V</i> /Å <sup>3</sup>                                     | 7618.4(15)                                                                                                                                                                             | 3070.5(3)                                                                                                                                                     |
| <i>Z</i>                                                     | 4                                                                                                                                                                                      | 2                                                                                                                                                             |
| temperature (K)                                              | 125                                                                                                                                                                                    | 243                                                                                                                                                           |
| radiation ( $\lambda$ , Å)                                   | 0.71073                                                                                                                                                                                | 0.71073                                                                                                                                                       |
| $\rho$ (calcd.), g cm <sup>-3</sup>                          | 1.471                                                                                                                                                                                  | 1.306                                                                                                                                                         |
| $\mu$ (Mo K $\alpha$ ), mm <sup>-1</sup>                     | 3.398                                                                                                                                                                                  | 0.972                                                                                                                                                         |
| $\theta$ max, deg.                                           | 26.37                                                                                                                                                                                  | 25.03                                                                                                                                                         |
| no. of data                                                  | 15575                                                                                                                                                                                  | 10181                                                                                                                                                         |
| no. of parameters                                            | 733                                                                                                                                                                                    | 632                                                                                                                                                           |
| <i>R</i> <sub>1</sub> [ <i>I</i> > 2 $\sigma$ ( <i>I</i> )]  | 0.0730                                                                                                                                                                                 | 0.0650                                                                                                                                                        |
| <i>wR</i> <sub>2</sub> [ <i>I</i> > 2 $\sigma$ ( <i>I</i> )] | 0.1667                                                                                                                                                                                 | 0.1020                                                                                                                                                        |
| GOF                                                          | 1.164                                                                                                                                                                                  | 1.046                                                                                                                                                         |

## Computational Details

Calculations were carried out using DFT as implemented in the Jaguar 7.0 suite of *ab initio* quantum chemistry programs.<sup>9</sup> Geometry optimizations were performed with the B3LYP density functional<sup>10</sup> using the 6-31G\*\* (C, H, P and S) and LACVP (Mo) basis sets.<sup>11</sup> The energies of the optimized structures were reevaluated by additional single point calculations on each optimized geometry using cc-pVTZ(-f) correlation consistent triple- $\zeta$  basis set for C, H, P, S and LACV3P for Mo (Table 2).

**Table 2.** Cartesian Coordinates for Geometry Optimized Structures

| <b>[(S<sub>4</sub>Calix<sup>H</sup>(SH)<sub>2</sub>(S)<sub>2</sub>]<sub>2</sub>Mo(PMe<sub>3</sub>)<sub>3</sub>H<sub>2</sub>]<br/>-5561.37570552486 Hartrees</b> |               |               |               |  |
|-----------------------------------------------------------------------------------------------------------------------------------------------------------------|---------------|---------------|---------------|--|
| <b>atom</b>                                                                                                                                                     | <b>x</b>      | <b>y</b>      | <b>z</b>      |  |
| Mo1                                                                                                                                                             | -1.3593496667 | 1.4175339904  | 3.5579425472  |  |
| P2                                                                                                                                                              | -2.9350699754 | 0.1948242293  | 5.1081176802  |  |
| P3                                                                                                                                                              | -2.8789219908 | 3.3229216213  | 2.8298483716  |  |
| P4                                                                                                                                                              | 0.4766900169  | 2.9899083219  | 4.3191930078  |  |
| S5                                                                                                                                                              | -2.8765743503 | 0.1089236182  | 1.9653939751  |  |
| S6                                                                                                                                                              | -0.0494808056 | 1.9209236965  | 1.3525266954  |  |
| S7                                                                                                                                                              | -0.5660108733 | 3.1396390790  | -2.1668248103 |  |
| S8                                                                                                                                                              | -2.1070780465 | -1.7824669006 | -2.8882039141 |  |
| S9                                                                                                                                                              | 0.0525993445  | -0.6560125538 | 3.3024392764  |  |
| S10                                                                                                                                                             | 2.4099777940  | 2.2805528748  | -0.8596611598 |  |
| S11                                                                                                                                                             | -1.8878225079 | 1.1458283290  | -4.3688231666 |  |
| S12                                                                                                                                                             | -4.1646234848 | -2.0238234831 | -0.2345929464 |  |
| C13                                                                                                                                                             | -2.0321026283 | -1.3764441141 | 1.5483502242  |  |
| C14                                                                                                                                                             | -2.5949645633 | -2.2968088007 | 0.6163471608  |  |
| C15                                                                                                                                                             | -2.0056489451 | -3.5456843981 | 0.4032030885  |  |
| C16                                                                                                                                                             | -0.8511568949 | -3.9321963464 | 1.0833441865  |  |
| C17                                                                                                                                                             | -0.2567906032 | -3.0315917460 | 1.9606461305  |  |
| C18                                                                                                                                                             | -0.8233860878 | -1.7702767741 | 2.1651422885  |  |
| C19                                                                                                                                                             | 1.3419794497  | 0.8491355938  | 1.3422274774  |  |

|     |               |               |               |
|-----|---------------|---------------|---------------|
| C20 | 1.4577094713  | -0.2257163802 | 2.2527823595  |
| C21 | 2.6172106711  | -0.9922717692 | 2.3640949258  |
| C22 | 3.7049582972  | -0.7400112989 | 1.5308867420  |
| C23 | 3.5942835122  | 0.2618187390  | 0.5673464032  |
| C24 | 2.4329052850  | 1.0313644716  | 0.4446567765  |
| C25 | 0.3324347288  | 1.7035849873  | -2.7011001751 |
| C26 | 1.6177691467  | 1.3676040595  | -2.2085687785 |
| C27 | 2.3405811387  | 0.3232399787  | -2.7964935222 |
| C28 | 1.8082619023  | -0.4259122120 | -3.8404313010 |
| C29 | 0.5139225196  | -0.1554614872 | -4.2755986614 |
| C30 | -0.2315404932 | 0.8808883003  | -3.7066813318 |
| C31 | -3.0813753683 | -0.4121858720 | -2.3140192278 |
| C32 | -3.9755811154 | -0.5270902766 | -1.2206924511 |
| C33 | -4.8637197406 | 0.5153748123  | -0.9329883704 |
| C34 | -4.8491076595 | 1.6955400091  | -1.6708674109 |
| C35 | -3.8864272445 | 1.8632965877  | -2.6627986974 |
| C36 | -3.0006993338 | 0.8306694508  | -2.9870505122 |
| C37 | -2.7479089025 | -1.6463101016 | 5.1748259152  |
| C38 | -2.7536070799 | 0.6057933577  | 6.9090728086  |
| C39 | -4.7728529196 | 0.3550238103  | 4.9292186247  |
| C40 | -4.6314102228 | 2.9515902159  | 2.3495832364  |
| C41 | -2.3738588203 | 4.2890852758  | 1.3314391706  |
| C42 | -3.1709239462 | 4.6768273089  | 4.0630450650  |
| C43 | 2.2090563568  | 2.3354011564  | 4.3829748442  |
| C44 | 0.7769711108  | 4.6078136204  | 3.4598533101  |
| C45 | 0.2998823309  | 3.5804968201  | 6.0708169646  |
| H46 | -1.8975553638 | 2.3706265994  | 4.8470636029  |
| H47 | -0.6870908430 | 1.0790469711  | 5.0767721453  |
| H48 | 0.2415857472  | 3.3747703275  | -1.1092511368 |
| H49 | -2.8234459522 | -2.6945738138 | -2.1964113761 |
| H50 | -2.4694746765 | -4.2272188670 | -0.3040780074 |
| H51 | -0.4123010632 | -4.9101652668 | 0.9126708443  |
| H52 | 0.6574284063  | -3.2980336265 | 2.4818523006  |
| H53 | 2.6650044460  | -1.7824376649 | 3.1078932739  |

|     |               |               |               |
|-----|---------------|---------------|---------------|
| H54 | 4.6182719421  | -1.3200694043 | 1.6212927307  |
| H55 | 4.4239215573  | 0.4666432091  | -0.1026075243 |
| H56 | 3.3355923014  | 0.1045137293  | -2.4233546665 |
| H57 | 2.3849104802  | -1.2268077137 | -4.2925920777 |
| H58 | 0.0557297552  | -0.7577226565 | -5.0530891802 |
| H59 | -5.5574155129 | 0.3877437769  | -0.1084854093 |
| H60 | -5.5485780493 | 2.4947201970  | -1.4439643717 |
| H61 | -3.8079009696 | 2.8017000325  | -3.2023750011 |
| H62 | -1.7231522269 | -1.8991609252 | 5.4611811237  |
| H63 | -2.9512756988 | -2.0730723196 | 4.1908450378  |
| H64 | -3.4382609310 | -2.0797127066 | 5.9059618461  |
| H65 | -1.7290251462 | 0.3969413181  | 7.2278457384  |
| H66 | -3.4466953984 | 0.0216572863  | 7.5233738599  |
| H67 | -2.9473389133 | 1.6707649469  | 7.0632162112  |
| H68 | -5.0752432317 | 1.3815918488  | 5.1553881511  |
| H69 | -5.2863380069 | -0.3199382684 | 5.6219270909  |
| H70 | -5.0599112506 | 0.1097278766  | 3.9050451803  |
| H71 | -5.1391165695 | 3.8730450543  | 2.0454790443  |
| H72 | -5.1743759157 | 2.5037773817  | 3.1832949756  |
| H73 | -4.6329802253 | 2.2475690861  | 1.5148511298  |
| H74 | -1.3765778448 | 4.7122332682  | 1.4637415122  |
| H75 | -3.0878716046 | 5.0975306077  | 1.1413405275  |
| H76 | -2.3464536788 | 3.6208764941  | 0.4663694659  |
| H77 | -2.2229673139 | 5.1182838641  | 4.3791245273  |
| H78 | -3.6613585109 | 4.2599619361  | 4.9471537288  |
| H79 | -3.8046283636 | 5.4630706865  | 3.6396568442  |
| H80 | 2.8751058772  | 3.0688489694  | 4.8495333335  |
| H81 | 2.5668750545  | 2.1185782493  | 3.3756697482  |
| H82 | 2.2314912831  | 1.4104767999  | 4.9650761961  |
| H83 | 1.6276065448  | 5.1282873151  | 3.9123249329  |
| H84 | -0.1038009326 | 5.2507316375  | 3.5362217299  |
| H85 | 0.9844503142  | 4.4176725655  | 2.4052141235  |
| H86 | 1.1302901945  | 4.2340900569  | 6.3575183895  |
| H87 | 0.2744287167  | 2.7176529748  | 6.7413477756  |

H88                    -0.6408319101                    4.1254057408                    6.1862208876

**[(S<sub>4</sub>Calix<sup>H</sup>(SH)<sub>2</sub>(S)<sub>2</sub>]Mo(PMe<sub>3</sub>)<sub>3</sub>, singlet state  
 -5560.18421026200 Hartrees**

| <b>atom</b> | <b>x</b>      | <b>y</b>      | <b>z</b>      |
|-------------|---------------|---------------|---------------|
| Mo1         | -1.3382591748 | 1.4406334778  | 3.1589391848  |
| P2          | -2.7814882916 | 0.5770663199  | 5.1912633208  |
| P3          | -2.7939969379 | 3.3820885365  | 2.8261929661  |
| P4          | 0.2769183167  | 2.7617265671  | 4.7467734867  |
| S5          | -2.8316407912 | 0.0584681141  | 1.9352341887  |
| S6          | 0.1019225796  | 2.1701875523  | 1.4216361174  |
| S7          | -0.7280654995 | 3.0768535814  | -2.2055450236 |
| S8          | -2.0471172466 | -1.9031858627 | -2.7725568032 |
| S9          | 0.1146119165  | -0.5468142443 | 3.1934113753  |
| S10         | 2.3623671861  | 2.4088810608  | -1.0036320553 |
| S11         | -2.0146195172 | 0.9823772071  | -4.3149696077 |
| S12         | -4.1432503630 | -2.2338584087 | -0.1367658003 |
| C13         | -1.9929791080 | -1.4881865360 | 1.5883868283  |
| C14         | -2.5715491373 | -2.4527135708 | 0.7274273395  |
| C15         | -1.9642882396 | -3.7048817432 | 0.5660997070  |
| C16         | -0.7807196204 | -4.0221849005 | 1.2265530704  |
| C17         | -0.1650132682 | -3.0580040566 | 2.0211024160  |
| C18         | -0.7499408384 | -1.8006884124 | 2.1683263679  |
| C19         | 1.4321174392  | 0.9786980050  | 1.2515683604  |
| C20         | 1.5147315698  | -0.1484336112 | 2.0866982473  |
| C21         | 2.6458223184  | -0.9644248710 | 2.1055446038  |
| C22         | 3.7089962587  | -0.7035798600 | 1.2418781257  |
| C23         | 3.6033686924  | 0.3457854896  | 0.3317493791  |
| C24         | 2.4660284604  | 1.1611707408  | 0.3036242173  |
| C25         | 0.2344036482  | 1.6835345640  | -2.7415526623 |
| C26         | 1.5584213370  | 1.4319842046  | -2.3016582613 |
| C27         | 2.3067534852  | 0.4100529313  | -2.8977911478 |
| C28         | 1.7637454859  | -0.4022329176 | -3.8866314253 |
| C29         | 0.4394446089  | -0.2135724332 | -4.2686682354 |



|     |               |               |               |
|-----|---------------|---------------|---------------|
| C30 | -0.3305025658 | 0.8042486950  | -3.6988093210 |
| C31 | -3.1043443165 | -0.5902524521 | -2.2187909951 |
| C32 | -3.9913204622 | -0.7352115654 | -1.1244566765 |
| C33 | -4.9170084083 | 0.2763043764  | -0.8386171729 |
| C34 | -4.9491064405 | 1.4521174895  | -1.5802968245 |
| C35 | -4.0049853412 | 1.6481459979  | -2.5839178141 |
| C36 | -3.0840018382 | 0.6468950334  | -2.9073469824 |
| C37 | -2.5745287041 | -1.2427188192 | 5.5025666159  |
| C38 | -2.6938152229 | 1.1842628562  | 6.9490269438  |
| C39 | -4.6220368807 | 0.6651037790  | 4.9591566474  |
| C40 | -4.4788531083 | 3.0937333798  | 2.0919780863  |
| C41 | -2.2006147972 | 4.7070389122  | 1.6612352427  |
| C42 | -3.2785008115 | 4.4531783121  | 4.2767310811  |
| C43 | 1.9452877827  | 1.9866900945  | 5.0019848657  |
| C44 | 0.7809080865  | 4.4183438934  | 4.0808194511  |
| C45 | -0.0855468377 | 3.2697986897  | 6.4992821173  |
| H46 | 0.1116647755  | 3.4053462564  | -1.1987109624 |
| H47 | -2.7029047828 | -2.8537877000 | -2.0738493964 |
| H48 | -2.4325716205 | -4.4351576991 | -0.0875456872 |
| H49 | -0.3289529952 | -5.0010390340 | 1.1004060970  |
| H50 | 0.7726814113  | -3.2814746783 | 2.5202985458  |
| H51 | 2.6963018032  | -1.7972253568 | 2.8008035316  |
| H52 | 4.6000433892  | -1.3231528233 | 1.2656226496  |
| H53 | 4.4092175407  | 0.5451157632  | -0.3671867688 |
| H54 | 3.3308850982  | 0.2564146291  | -2.5761007731 |
| H55 | 2.3598035060  | -1.1869479541 | -4.3411710800 |
| H56 | -0.0197605432 | -0.8626628617 | -5.0064737872 |
| H57 | -5.5999282606 | 0.1313813111  | -0.0090637710 |
| H58 | -5.6756350586 | 2.2251718231  | -1.3521390677 |
| H59 | -3.9690916740 | 2.5829856437  | -3.1331972187 |
| H60 | -1.5456845805 | -1.4424425019 | 5.8156504919  |
| H61 | -2.7619209873 | -1.7916796663 | 4.5768223928  |
| H62 | -3.2607954895 | -1.5998949382 | 6.2783153846  |
| H63 | -1.7133126983 | 0.9684289644  | 7.3778013788  |

|     |               |              |              |
|-----|---------------|--------------|--------------|
| H64 | -3.4539822515 | 0.6821069691 | 7.5559230290 |
| H65 | -2.8636874224 | 2.2619215103 | 6.9932517030 |
| H66 | -4.9511717073 | 1.7071742318 | 4.9941583277 |
| H67 | -5.1409384399 | 0.1068823979 | 5.7459439331 |
| H68 | -4.8794841343 | 0.2465940469 | 3.9842413840 |
| H69 | -5.0155502963 | 4.0368928729 | 1.9399990209 |
| H70 | -5.0710767068 | 2.4502419625 | 2.7464046211 |
| H71 | -4.3639664986 | 2.5842822300 | 1.1320166476 |
| H72 | -1.2391554202 | 5.1027736920 | 1.9959206397 |
| H73 | -2.9204699057 | 5.5293243372 | 1.5850238748 |
| H74 | -2.0555913436 | 4.2659649243 | 0.6713968945 |
| H75 | -2.3842353644 | 4.8912747541 | 4.7296487884 |
| H76 | -3.7748931825 | 3.8433469844 | 5.0373768987 |
| H77 | -3.9531184447 | 5.2650724152 | 3.9824838967 |
| H78 | 2.6033090063  | 2.6290402154 | 5.5973809645 |
| H79 | 2.4111139745  | 1.7980604275 | 4.0318984645 |
| H80 | 1.8267177049  | 1.0262881884 | 5.5116521604 |
| H81 | 1.5820566361  | 4.8534532988 | 4.6887017611 |
| H82 | -0.0754570658 | 5.0975156193 | 4.0923626485 |
| H83 | 1.1184205924  | 4.3044931048 | 3.0491891015 |
| H84 | 0.7018334421  | 3.9374056094 | 6.8636867384 |
| H85 | -0.1270066648 | 2.3972400161 | 7.1528551601 |
| H86 | -1.0437289460 | 3.7908716598 | 6.5544078211 |

**[(S<sub>4</sub>Calix<sup>H</sup>(SH)<sub>2</sub>(S)<sub>2</sub>)]Mo(PMe<sub>3</sub>)<sub>3</sub> triplet state  
 -5560.18266395550 Hartrees**

| <b>atom</b> | <b>x</b>      | <b>y</b>     | <b>z</b>      |
|-------------|---------------|--------------|---------------|
| Mo1         | -1.3235149930 | 1.4905509839 | 3.3129279710  |
| P2          | -2.8463858876 | 0.4810474692 | 5.1574824949  |
| P3          | -2.8247078773 | 3.4638372724 | 2.8231370830  |
| P4          | 0.3552737189  | 2.8786646147 | 4.7281186226  |
| S5          | -2.8012245261 | 0.1217628864 | 1.8579865456  |
| S6          | 0.1788562382  | 2.2176942859 | 1.4512849695  |
| S7          | -0.7601666078 | 2.9259706466 | -2.0924608534 |

|     |               |               |               |
|-----|---------------|---------------|---------------|
| S8  | -1.9920939706 | -1.9267894041 | -2.7264997530 |
| S9  | 0.1171331568  | -0.5263624961 | 3.2245265670  |
| S10 | 2.3786663056  | 2.3306330045  | -1.0473599226 |
| S11 | -2.0131869728 | 0.9358428191  | -4.3606327619 |
| S12 | -4.1260647944 | -2.2275723163 | -0.1225018489 |
| C13 | -1.9893282375 | -1.4230389954 | 1.5937243152  |
| C14 | -2.5615956677 | -2.4212231947 | 0.7557916943  |
| C15 | -1.9833454339 | -3.6910679755 | 0.6587848993  |
| C16 | -0.8331597431 | -4.0230722273 | 1.3729188436  |
| C17 | -0.2235571567 | -3.0462480560 | 2.1555344411  |
| C18 | -0.7762834284 | -1.7665245164 | 2.2353117211  |
| C19 | 1.4173721590  | 0.9751935726  | 1.2496492950  |
| C20 | 1.4927079807  | -0.1501430563 | 2.1031008691  |
| C21 | 2.5859307568  | -1.0175741618 | 2.0957448408  |
| C22 | 3.6253487956  | -0.8278846125 | 1.1892741989  |
| C23 | 3.5282423931  | 0.2106695609  | 0.2641898090  |
| C24 | 2.4356940034  | 1.0819261064  | 0.2607772106  |
| C25 | 0.2336924027  | 1.6157229856  | -2.7625682307 |
| C26 | 1.5805510913  | 1.3919077740  | -2.3778012529 |
| C27 | 2.3542867230  | 0.4479786635  | -3.0621599642 |
| C28 | 1.8176429449  | -0.3211014717 | -4.0905623659 |
| C29 | 0.4745316007  | -0.1668663574 | -4.4202876070 |
| C30 | -0.3196329943 | 0.7804739381  | -3.7649875730 |
| C31 | -3.0907170520 | -0.6195875675 | -2.2342028898 |
| C32 | -3.9970812850 | -0.7568535335 | -1.1537022245 |
| C33 | -4.9555902261 | 0.2339839199  | -0.9148417474 |
| C34 | -5.0058554986 | 1.3849048685  | -1.6941481716 |
| C35 | -4.0459365217 | 1.5791961482  | -2.6826803035 |
| C36 | -3.0888254798 | 0.5975195725  | -2.9572953819 |
| C37 | -2.6396508418 | -1.3484597703 | 5.3618578505  |
| C38 | -2.7361471640 | 1.0194632774  | 6.9360125166  |
| C39 | -4.6801831754 | 0.5878976783  | 4.9033173983  |
| C40 | -4.4795463315 | 3.1389795478  | 2.0500372380  |
| C41 | -2.1914356655 | 4.7492536172  | 1.6465795341  |

|     |               |               |               |
|-----|---------------|---------------|---------------|
| C42 | -3.3213245368 | 4.5165814712  | 4.2752025629  |
| C43 | 2.0457840507  | 2.1309319810  | 4.8632687777  |
| C44 | 0.7874375678  | 4.5719032261  | 4.1060003493  |
| C45 | 0.0324229836  | 3.2743976396  | 6.5191075307  |
| H46 | 0.0929493713  | 3.1985620087  | -1.0800370898 |
| H47 | -2.6452783445 | -2.8687015851 | -2.0133327075 |
| H48 | -2.4536210003 | -4.4303356637 | 0.0163113717  |
| H49 | -0.4070158845 | -5.0186758037 | 1.2992080779  |
| H50 | 0.6873720517  | -3.2727256381 | 2.7001717755  |
| H51 | 2.6218670654  | -1.8389236028 | 2.8050811820  |
| H52 | 4.4874032615  | -1.4878606539 | 1.1898900758  |
| H53 | 4.3132449665  | 0.3594326256  | -0.4704870193 |
| H54 | 3.3939313754  | 0.3238479652  | -2.7785157954 |
| H55 | 2.4329727712  | -1.0468243274 | -4.6132180980 |
| H56 | 0.0175443876  | -0.7861247985 | -5.1851575665 |
| H57 | -5.6476155626 | 0.0946973080  | -0.0911867206 |
| H58 | -5.7586158226 | 2.1444753017  | -1.5039503445 |
| H59 | -4.0242890165 | 2.4997689190  | -3.2571698513 |
| H60 | -1.6159679849 | -1.5715356755 | 5.6754006952  |
| H61 | -2.8199084392 | -1.8359845158 | 4.4013114290  |
| H62 | -3.3373328065 | -1.7456436222 | 6.1065811273  |
| H63 | -1.7377844687 | 0.8059701644  | 7.3268883216  |
| H64 | -3.4711416148 | 0.4923586633  | 7.5533466920  |
| H65 | -2.9129881113 | 2.0953444449  | 7.0201976788  |
| H66 | -5.0119963205 | 1.6267162286  | 4.9873781277  |
| H67 | -5.2153789724 | -0.0119163804 | 5.6472226797  |
| H68 | -4.9129588758 | 0.2208264536  | 3.9013145227  |
| H69 | -5.0162902470 | 4.0760750916  | 1.8656034625  |
| H70 | -5.0830828400 | 2.5006430530  | 2.6990101689  |
| H71 | -4.3317503047 | 2.6139202086  | 1.1026210104  |
| H72 | -1.2439586674 | 5.1592913296  | 2.0018241049  |
| H73 | -2.9152679522 | 5.5615194003  | 1.5209017140  |
| H74 | -2.0119657546 | 4.2752207553  | 0.6780461416  |
| H75 | -2.4352512802 | 4.9403865368  | 4.7555619044  |

|     |               |              |              |
|-----|---------------|--------------|--------------|
| H76 | -3.8517277522 | 3.9082978330 | 5.0133791644 |
| H77 | -3.9758434347 | 5.3367491070 | 3.9609052769 |
| H78 | 2.7259819691  | 2.7827206015 | 5.4218270106 |
| H79 | 2.4446449313  | 1.9680093040 | 3.8596978173 |
| H80 | 1.9819652175  | 1.1629674325 | 5.3683539072 |
| H81 | 1.6121082692  | 5.0034400085 | 4.6832944437 |
| H82 | -0.0785450716 | 5.2350666084 | 4.1856699802 |
| H83 | 1.0753112227  | 4.4937627188 | 3.0554679109 |
| H84 | 0.8310886226  | 3.8983784759 | 6.9344973932 |
| H85 | -0.0262834717 | 2.3517832350 | 7.1019411080 |
| H86 | -0.9179543554 | 3.8054108615 | 6.6252757747 |

**[(S<sub>4</sub>Calix<sup>H</sup>(SH)<sub>2</sub>(S)<sub>2</sub>]W(PMe<sub>3</sub>)<sub>3</sub>H<sub>2</sub>  
 -5561.67550076989 Hartrees**

| <b>atom</b> | <b>x</b>      | <b>y</b>      | <b>z</b>      |
|-------------|---------------|---------------|---------------|
| W1          | -2.7871151579 | 0.4079086260  | 2.9575053005  |
| P2          | -4.7591408548 | -1.1183535032 | 3.3377365646  |
| P3          | -4.0365876611 | 2.4796416695  | 2.1961918032  |
| P4          | -1.5317902158 | 1.6623915653  | 4.7602370362  |
| S5          | -3.4244762578 | -0.3634834216 | 0.6104175727  |
| S6          | -0.7549208853 | 1.4311462389  | 1.6841524015  |
| S7          | 0.0434914287  | 3.5845488942  | -1.2788927032 |
| S8          | -0.5954875076 | -0.7985522624 | -3.8222348998 |
| S9          | -1.2424108090 | -1.5572674712 | 2.7722390074  |
| S10         | 2.3454675544  | 2.2735877245  | 0.7941926649  |
| S11         | -0.1216842887 | 2.4134025867  | -4.2968431513 |
| S12         | -3.5121222767 | -1.7468555836 | -2.4210975741 |
| C13         | -2.3593637040 | -1.7022469155 | 0.1898159741  |
| C14         | -2.4089070882 | -2.2975210937 | -1.1025458563 |
| C15         | -1.6814986279 | -3.4583253583 | -1.3794710473 |
| C16         | -0.8850916354 | -4.0659341808 | -0.4099213038 |
| C17         | -0.7835851890 | -3.4716591475 | 0.8433942614  |
| C18         | -1.4856524135 | -2.2979408778 | 1.1233213438  |
| C19         | 0.6072654723  | 0.3445618840  | 1.9356829790  |

|     |               |               |               |
|-----|---------------|---------------|---------------|
| C20 | 0.4357007397  | -0.9340993099 | 2.5103372447  |
| C21 | 1.5076603708  | -1.7550303741 | 2.8585831215  |
| C22 | 2.8119758851  | -1.3393379829 | 2.5991610072  |
| C23 | 3.0140269517  | -0.1161170746 | 1.9615004647  |
| C24 | 1.9427707624  | 0.7112307317  | 1.6073446120  |
| C25 | 1.2113526547  | 2.3540945663  | -1.8030366935 |
| C26 | 2.2249161612  | 1.8356616019  | -0.9590891557 |
| C27 | 3.2140437978  | 1.0000609356  | -1.4904294008 |
| C28 | 3.2085398267  | 0.6333187842  | -2.8325940163 |
| C29 | 2.1705687078  | 1.0712916822  | -3.6501482321 |
| C30 | 1.1677420936  | 1.9045912233  | -3.1454441320 |
| C31 | -1.8572651451 | 0.3657528469  | -3.3690008610 |
| C32 | -3.0919314229 | -0.0373449007 | -2.8019505226 |
| C33 | -4.1214271512 | 0.8959070956  | -2.6376688538 |
| C34 | -3.9367091687 | 2.2332009631  | -2.9740945377 |
| C35 | -2.6877529858 | 2.6576996967  | -3.4184012797 |
| C36 | -1.6472198293 | 1.7441012386  | -3.6122469693 |
| C37 | -4.4915668055 | -2.9186963527 | 2.9913021758  |
| C38 | -5.3412429013 | -1.2083498712 | 5.0974235578  |
| C39 | -6.3816631791 | -0.8442633064 | 2.4816633007  |
| C40 | -5.3997386071 | 2.3301421920  | 0.9443405367  |
| C41 | -3.0643725420 | 3.8284912530  | 1.3756299829  |
| C42 | -4.9339164006 | 3.4179946059  | 3.5197946167  |
| C43 | 0.0966163205  | 0.9860918038  | 5.3323459241  |
| C44 | -1.0774413488 | 3.4519782894  | 4.5606967036  |
| C45 | -2.4257306098 | 1.7350895426  | 6.3862376190  |
| H46 | -3.8660677739 | 1.0089593440  | 4.1325639899  |
| H47 | -2.7400553774 | -0.3816798080 | 4.4717081579  |
| H48 | 0.3643842537  | 3.4786247725  | 0.0292632883  |
| H49 | -1.4282319328 | -1.8596366857 | -3.7512747614 |
| H50 | -1.7529179289 | -3.8939288746 | -2.3719241595 |
| H51 | -0.3356220522 | -4.9738108680 | -0.6377156752 |
| H52 | -0.1460127476 | -3.9095510830 | 1.6050876139  |
| H53 | 1.3170764045  | -2.7128110960 | 3.3339415187  |

|     |               |               |               |
|-----|---------------|---------------|---------------|
| H54 | 3.6569859705  | -1.9607512385 | 2.8788414056  |
| H55 | 4.0219045003  | 0.2212980481  | 1.7401909531  |
| H56 | 3.9987195494  | 0.6408975209  | -0.8328341770 |
| H57 | 3.9894613762  | -0.0071340023 | -3.2303960479 |
| H58 | 2.1117547265  | 0.7571242860  | -4.6868784495 |
| H59 | -5.0661938762 | 0.5547601815  | -2.2276465767 |
| H60 | -4.7454554344 | 2.9473088412  | -2.8485824401 |
| H61 | -2.5016856977 | 3.7079366159  | -3.6193843774 |
| H62 | -3.6517547365 | -3.2840243477 | 3.5891976506  |
| H63 | -4.2548843774 | -3.0571352431 | 1.9345927996  |
| H64 | -5.3848286698 | -3.5011696936 | 3.2399517991  |
| H65 | -4.5176433677 | -1.5368651956 | 5.7364648794  |
| H66 | -6.1781732943 | -1.9062678093 | 5.2031334631  |
| H67 | -5.6565804142 | -0.2164159491 | 5.4319734861  |
| H68 | -6.8205563780 | 0.0986954357  | 2.8204345417  |
| H69 | -7.0801504839 | -1.6555388906 | 2.7117094502  |
| H70 | -6.2209902527 | -0.8014160672 | 1.4028826233  |
| H71 | -5.8225227774 | 3.3180677383  | 0.7335113826  |
| H72 | -6.1912785181 | 1.6746997131  | 1.3103229980  |
| H73 | -4.9965731238 | 1.9075321210  | 0.0218643303  |
| H74 | -2.2534751441 | 4.1677875476  | 2.0221087898  |
| H75 | -3.7151698576 | 4.6759996012  | 1.1359429719  |
| H76 | -2.6242779001 | 3.4402204899  | 0.4530552729  |
| H77 | -4.2441823518 | 3.7224665146  | 4.3101980869  |
| H78 | -5.6958434614 | 2.7728785968  | 3.9656764835  |
| H79 | -5.4169363455 | 4.3094474458  | 3.1066033170  |
| H80 | 0.4615666789  | 1.5495716935  | 6.1973944634  |
| H81 | 0.8330826713  | 1.0479302338  | 4.5299221135  |
| H82 | -0.0227538847 | -0.0635572544 | 5.6132599178  |
| H83 | -0.5162321417 | 3.8038326148  | 5.4326035646  |
| H84 | -1.9765475693 | 4.0649778982  | 4.4567501500  |
| H85 | -0.4650665643 | 3.5674255431  | 3.6642993361  |
| H86 | -1.8306932230 | 2.2569726428  | 7.1428195634  |
| H87 | -2.6325658640 | 0.7185140451  | 6.7302115481  |

H88                    -3.3815807354                    2.2509147865                    6.2631929848

**[(S<sub>4</sub>Calix<sup>H</sup>(SH)<sub>2</sub>(S)<sub>2</sub>]W(PMe<sub>3</sub>)<sub>3</sub> singlet state  
 -5560.46977463939 Hartrees**

| <b>atom</b> | <b>x</b>      | <b>y</b>      | <b>z</b>      |
|-------------|---------------|---------------|---------------|
| W1          | -1.3150189460 | 1.4850352884  | 3.2083497954  |
| P2          | -2.7632117147 | 0.5465747614  | 5.1688670899  |
| P3          | -2.7707509653 | 3.4118447069  | 2.8572665667  |
| P4          | 0.2592306807  | 2.7931690209  | 4.8136100281  |
| S5          | -2.7786886714 | 0.1321949285  | 1.9274909507  |
| S6          | 0.1465559660  | 2.2237615717  | 1.4917358139  |
| S7          | -0.7913718531 | 2.9313154280  | -2.1436123450 |
| S8          | -2.0048944995 | -1.9413893092 | -2.6580086605 |
| S9          | 0.1198917942  | -0.4868245944 | 3.2506414897  |
| S10         | 2.3446686137  | 2.3587478986  | -1.0424344859 |
| S11         | -2.0381021234 | 0.8814592169  | -4.3217573452 |
| S12         | -4.1364875897 | -2.2293272595 | -0.0450837314 |
| C13         | -1.9697779280 | -1.4525549573 | 1.6437251566  |
| C14         | -2.5601158981 | -2.4339255566 | 0.8136824857  |
| C15         | -1.9728951115 | -3.7004762753 | 0.6938334689  |
| C16         | -0.7996431187 | -4.0167019555 | 1.3737691644  |
| C17         | -0.1769894939 | -3.0369974726 | 2.1455423489  |
| C18         | -0.7434313110 | -1.7680176379 | 2.2463836271  |
| C19         | 1.4376347076  | 0.9809842905  | 1.2648315119  |
| C20         | 1.5113698460  | -0.1399591805 | 2.1041454939  |
| C21         | 2.6085010914  | -0.9991214740 | 2.0922429743  |
| C22         | 3.6463072694  | -0.7867336164 | 1.1859201154  |
| C23         | 3.5435342679  | 0.2567202517  | 0.2694294024  |
| C24         | 2.4379995517  | 1.1161349365  | 0.2745659891  |
| C25         | 0.2102116465  | 1.6002566859  | -2.7540037549 |
| C26         | 1.5539146754  | 1.3865978179  | -2.3540201409 |
| C27         | 2.3286031534  | 0.4222280590  | -3.0084707956 |
| C28         | 1.7946985022  | -0.3754648311 | -4.0162210031 |
| C29         | 0.4524382424  | -0.2313328753 | -4.3552748737 |



|     |               |               |               |
|-----|---------------|---------------|---------------|
| C30 | -0.3419975690 | 0.7353172918  | -3.7305041411 |
| C31 | -3.1037323288 | -0.6349410253 | -2.1668918737 |
| C32 | -4.0024691532 | -0.7601187341 | -1.0780519892 |
| C33 | -4.9531385879 | 0.2391996627  | -0.8364236082 |
| C34 | -5.0027154991 | 1.3833318981  | -1.6262620155 |
| C35 | -4.0539036702 | 1.5623656077  | -2.6287561488 |
| C36 | -3.1041417494 | 0.5735681199  | -2.9032168890 |
| C37 | -2.6216913077 | -1.2957277603 | 5.3701651574  |
| C38 | -2.6108367030 | 1.0312201677  | 6.9591995819  |
| C39 | -4.6063734674 | 0.6948638076  | 4.9803154534  |
| C40 | -4.4287236186 | 3.1234492695  | 2.0543078874  |
| C41 | -2.1716307941 | 4.7608004752  | 1.7174452606  |
| C42 | -3.3280758009 | 4.4759345713  | 4.2934558790  |
| C43 | 1.9207750244  | 2.0110363506  | 5.1026701767  |
| C44 | 0.7922739564  | 4.4559704049  | 4.1797409199  |
| C45 | -0.1506097759 | 3.2798864844  | 6.5621894318  |
| H46 | 0.0859524156  | 3.2883699303  | -1.1799624423 |
| H47 | -2.6613908588 | -2.8870140089 | -1.9530749858 |
| H48 | -2.4515851805 | -4.4433407664 | 0.0618764093  |
| H49 | -0.3626589902 | -5.0065033763 | 1.2821973074  |
| H50 | 0.7512662733  | -3.2583906019 | 2.6631846108  |
| H51 | 2.6537665507  | -1.8265462358 | 2.7944306895  |
| H52 | 4.5155432550  | -1.4377051154 | 1.1812530113  |
| H53 | 4.3295759962  | 0.4201186020  | -0.4609416418 |
| H54 | 3.3671018555  | 0.3043639176  | -2.7181779175 |
| H55 | 2.4120837549  | -1.1156909992 | -4.5154728061 |
| H56 | -0.0018944277 | -0.8727497604 | -5.1032114198 |
| H57 | -5.6388277135 | 0.1118945728  | -0.0057860388 |
| H58 | -5.7468927152 | 2.1503212829  | -1.4333857773 |
| H59 | -4.0354454142 | 2.4769978606  | -3.2127000030 |
| H60 | -1.5982808435 | -1.5553640267 | 5.6555265839  |
| H61 | -2.8465169097 | -1.7831497455 | 4.4191668055  |
| H62 | -3.3120384453 | -1.6669029750 | 6.1352746352  |
| H63 | -1.6214127428 | 0.7663818783  | 7.3391720922  |

|     |               |              |              |
|-----|---------------|--------------|--------------|
| H64 | -3.3599273210 | 0.4964696154 | 7.5518398344 |
| H65 | -2.7615558744 | 2.1046322755 | 7.0887654218 |
| H66 | -4.9115507468 | 1.7413096647 | 5.0626219003 |
| H67 | -5.1244865462 | 0.1141215096 | 5.7512140116 |
| H68 | -4.8912131096 | 0.3218669582 | 3.9943797462 |
| H69 | -4.9656716232 | 4.0665420280 | 1.9047026062 |
| H70 | -5.0416076436 | 2.4607646251 | 2.6699035845 |
| H71 | -4.2751100427 | 2.6398458924 | 1.0862173350 |
| H72 | -1.2235557740 | 5.1723338752 | 2.0719316607 |
| H73 | -2.9046392053 | 5.5707614299 | 1.6353389430 |
| H74 | -2.0031773797 | 4.3306888350 | 0.7264711554 |
| H75 | -2.4590244430 | 4.9316536129 | 4.7776390424 |
| H76 | -3.8422560913 | 3.8589417445 | 5.0366066202 |
| H77 | -4.0059110309 | 5.2746142439 | 3.9714642958 |
| H78 | 2.5756152090  | 2.6552624427 | 5.6997218813 |
| H79 | 2.3966654233  | 1.8117588350 | 4.1391803391 |
| H80 | 1.7893026360  | 1.0558192022 | 5.6196260016 |
| H81 | 1.5854531645  | 4.8722212718 | 4.8103194342 |
| H82 | -0.0576292517 | 5.1436747758 | 4.1836401079 |
| H83 | 1.1513733768  | 4.3529446705 | 3.1542584460 |
| H84 | 0.6325790022  | 3.9357454919 | 6.9556412847 |
| H85 | -0.2168761027 | 2.4009264916 | 7.2045774870 |
| H86 | -1.1047537867 | 3.8106943761 | 6.5965759867 |

**[(S<sub>4</sub>Calix<sup>H</sup>(SH)<sub>2</sub>(S)<sub>2</sub>]W(PMe<sub>3</sub>)<sub>3</sub> triplet state  
 -5560.45972106575 Hartrees**

| <b>atom</b> | <b>x</b>     | <b>y</b>    | <b>z</b>     |
|-------------|--------------|-------------|--------------|
| W1          | -1.340407949 | 1.446323488 | 3.353035875  |
| P2          | -2.791142457 | 0.489623767 | 5.215290612  |
| P3          | -2.826517678 | 3.388159568 | 2.891849401  |
| P4          | 0.332266406  | 2.822575306 | 4.675110386  |
| S5          | -2.855383714 | 0.079173882 | 1.953760414  |
| S6          | 0.058849400  | 2.122679286 | 1.402608609  |
| S7          | -0.675755408 | 3.098589899 | -2.253426226 |

|     |              |              |              |
|-----|--------------|--------------|--------------|
| S8  | -2.045573124 | -1.880571074 | -2.791838933 |
| S9  | 0.093731387  | -0.540687418 | 3.242502760  |
| S10 | 2.363715554  | 2.366419551  | -0.974326367 |
| S11 | -1.978890611 | 0.997860817  | -4.346434568 |
| S12 | -4.136686103 | -2.177185992 | -0.155519080 |
| C13 | -2.008734541 | -1.430973528 | 1.594179762  |
| C14 | -2.573041195 | -2.400040895 | 0.718338568  |
| C15 | -1.973236479 | -3.654823315 | 0.568208996  |
| C16 | -0.805097538 | -3.988181533 | 1.251516860  |
| C17 | -0.198448425 | -3.029959904 | 2.058701763  |
| C18 | -0.777176273 | -1.768227630 | 2.200365598  |
| C19 | 1.390384871  | 0.969847733  | 1.285880074  |
| C20 | 1.495491527  | -0.136051517 | 2.157588352  |
| C21 | 2.639960953  | -0.932226131 | 2.213740504  |
| C22 | 3.709425172  | -0.682245717 | 1.356821568  |
| C23 | 3.592070157  | 0.339154131  | 0.414427703  |
| C24 | 2.444873386  | 1.134638236  | 0.345553615  |
| C25 | 0.261309850  | 1.674351498  | -2.754021525 |
| C26 | 1.568870471  | 1.396493562  | -2.283134965 |
| C27 | 2.306858857  | 0.353468207  | -2.855165020 |
| C28 | 1.768644890  | -0.451363306 | -3.852887454 |
| C29 | 0.457203975  | -0.236516514 | -4.264632817 |
| C30 | -0.302961996 | 0.799609713  | -3.715103978 |
| C31 | -3.086897763 | -0.552867514 | -2.244100089 |
| C32 | -3.974394253 | -0.685174604 | -1.149989727 |
| C33 | -4.890709299 | 0.335783807  | -0.870521130 |
| C34 | -4.913334094 | 1.508129511  | -1.618392815 |
| C35 | -3.966888975 | 1.691127946  | -2.622504675 |
| C36 | -3.055210666 | 0.679794871  | -2.940098603 |
| C37 | -2.580842172 | -1.334801806 | 5.471380680  |
| C38 | -2.642044952 | 1.078563973  | 6.974138143  |
| C39 | -4.632924882 | 0.595168562  | 5.014445528  |
| C40 | -4.503960717 | 3.060973546  | 2.172638538  |
| C41 | -2.218100668 | 4.656307706  | 1.684172955  |

|     |              |              |              |
|-----|--------------|--------------|--------------|
| C42 | -3.273245523 | 4.461711224  | 4.341761577  |
| C43 | 1.999953789  | 2.049282672  | 4.929561195  |
| C44 | 0.833625526  | 4.464442777  | 3.971588179  |
| C45 | -0.025692932 | 3.347100129  | 6.425155417  |
| H46 | 0.139054741  | 3.399108022  | -1.217407998 |
| H47 | -2.708774094 | -2.817984590 | -2.082042852 |
| H48 | -2.436411818 | -4.379458825 | -0.095205107 |
| H49 | -0.360514698 | -4.970892237 | 1.133113897  |
| H50 | 0.729582271  | -3.260223332 | 2.572639805  |
| H51 | 2.694848521  | -1.743418930 | 2.934041238  |
| H52 | 4.610805479  | -1.284054116 | 1.410390774  |
| H53 | 4.402900150  | 0.533260890  | -0.280215187 |
| H54 | 3.318344250  | 0.176516630  | -2.506332438 |
| H55 | 2.357203088  | -1.251996045 | -4.289020718 |
| H56 | -0.001087752 | -0.881184698 | -5.006738889 |
| H57 | -5.576454649 | 0.198978917  | -0.041530060 |
| H58 | -5.633939632 | 2.288451853  | -1.394806097 |
| H59 | -3.922116229 | 2.622722006  | -3.176679525 |
| H60 | -1.547851050 | -1.546642020 | 5.761173844  |
| H61 | -2.788926610 | -1.852122318 | 4.531972853  |
| H62 | -3.255599492 | -1.708611667 | 6.248879974  |
| H63 | -1.636649998 | 0.876683848  | 7.351343069  |
| H64 | -3.365481256 | 0.566646076  | 7.617445125  |
| H65 | -2.820813562 | 2.155164048  | 7.030719824  |
| H66 | -4.959098968 | 1.636083397  | 5.092894529  |
| H67 | -5.143743994 | 0.010184402  | 5.786608325  |
| H68 | -4.898777009 | 0.211571537  | 4.027204723  |
| H69 | -5.037786011 | 3.997583530  | 1.977517761  |
| H70 | -5.093805819 | 2.446335853  | 2.855532523  |
| H71 | -4.385014536 | 2.509013203  | 1.236840441  |
| H72 | -1.269709026 | 5.077016284  | 2.022895230  |
| H73 | -2.949277006 | 5.461374252  | 1.553738201  |
| H74 | -2.044528437 | 4.168342576  | 0.721515542  |
| H75 | -2.372919799 | 4.913560968  | 4.765783963  |

|     |              |             |             |
|-----|--------------|-------------|-------------|
| H76 | -3.753930421 | 3.862302220 | 5.119631446 |
| H77 | -3.958029991 | 5.261314659 | 4.040159599 |
| H78 | 2.661203397  | 2.707015968 | 5.503805176 |
| H79 | 2.454789984  | 1.840121992 | 3.958965252 |
| H80 | 1.886623930  | 1.102223870 | 5.464687330 |
| H81 | 1.676569056  | 4.886738578 | 4.528980267 |
| H82 | -0.004713746 | 5.164571517 | 4.025652491 |
| H83 | 1.110307485  | 4.330283117 | 2.924061873 |
| H84 | 0.762941605  | 4.008786144 | 6.799050738 |
| H85 | -0.082313432 | 2.471926786 | 7.075645616 |
| H86 | -0.981442959 | 3.874757517 | 6.477297330 |

*syn*-[(S<sub>4</sub>Calix<sup>H</sup>(S)<sub>4</sub>][W(PMe<sub>3</sub>)<sub>3</sub>H<sub>2</sub>]<sub>2</sub>  
 -7012.16521086407 Hartrees (B3YLP/6-31G\*\* and LACVP)

| atom | x             | y            | z             |
|------|---------------|--------------|---------------|
| W1   | 1.6125730229  | 4.1905322212 | 0.8732416075  |
| H2   | 3.2523699837  | 3.9641739147 | 1.2862898289  |
| H3   | 2.6983881628  | 4.0440185150 | -0.4450760891 |
| W4   | -4.8024827872 | 6.9831367943 | 5.4966579747  |
| H5   | -6.4128029567 | 7.1095982099 | 6.0550569324  |
| H6   | -5.0042965567 | 7.3839939185 | 7.1428410588  |
| P7   | 2.3180049575  | 1.8035527523 | 0.5070230720  |
| P8   | 2.0065810525  | 4.2565298761 | 3.3739338584  |
| P9   | 2.9193717141  | 6.3243977568 | 0.4003908074  |
| P10  | -5.5191171700 | 9.3812152855 | 5.7809189146  |
| P11  | -2.6210659175 | 7.1245847871 | 6.7673440585  |
| P12  | -5.5812904048 | 4.9392523353 | 6.7849644907  |
| S13  | -0.3771519803 | 2.8033692219 | 1.6703842496  |
| S14  | -0.1127916627 | 6.1023041288 | 1.3088840831  |
| S15  | -3.4247626577 | 8.2546797621 | 3.7424513998  |
| S16  | -3.7604155676 | 4.9450147934 | 4.1975879687  |
| S17  | -6.3533104074 | 6.7296715035 | 3.5587317616  |
| S18  | -3.4326229087 | 2.1380081528 | 2.4133036339  |
| S19  | 0.2577903362  | 4.2130006195 | -1.2466275222 |

|     |               |              |               |
|-----|---------------|--------------|---------------|
| S20 | -1.8685408608 | 8.8750171395 | 0.9261982601  |
| C21 | -1.6272207184 | 2.9862620753 | 0.4434236860  |
| C22 | -1.3476172701 | 3.4476864711 | -0.8582797321 |
| C23 | -2.2968750694 | 3.4109617465 | -1.8798753271 |
| H24 | -2.0352604043 | 3.7593829983 | -2.8743690860 |
| C25 | -3.5834758466 | 2.9631061124 | -1.6039674877 |
| C26 | -3.9117858881 | 2.5768636790 | -0.3059575595 |
| H27 | -4.9261036681 | 2.2653401679 | -0.0891740880 |
| C28 | -2.9677190867 | 2.6034413467 | 0.7216023463  |
| C29 | -0.6090765402 | 6.6666791942 | -0.2807049664 |
| C30 | -1.2433742925 | 7.9255771397 | -0.4759030499 |
| C31 | -1.3809284994 | 8.4484107676 | -1.7682490942 |
| H32 | -1.7864098919 | 9.4501918023 | -1.8779786136 |
| C33 | -1.0185680298 | 7.7136902091 | -2.8992014224 |
| C34 | -0.5364597472 | 6.4148389591 | -2.7289775056 |
| H35 | -0.2900806292 | 5.7979982392 | -3.5890239405 |
| C36 | -0.3463622979 | 5.9094156948 | -1.4445612804 |
| C37 | -4.2164471042 | 7.9531519635 | 2.1877442350  |
| C38 | -5.5231699486 | 7.4304373233 | 2.0998292406  |
| C39 | -6.2249242894 | 7.3570445640 | 0.8965077526  |
| H40 | -7.2354481438 | 6.9603851888 | 0.8848322981  |
| C41 | -5.6110970013 | 7.7598314544 | -0.2823970882 |
| C42 | -4.2971058169 | 8.2170469760 | -0.2408675365 |
| H43 | -3.8087083629 | 8.5038774715 | -1.1641026127 |
| C44 | -3.5876363403 | 8.2996619483 | 0.9592320948  |
| C45 | -5.0669509446 | 4.2975575832 | 3.2064217607  |
| C46 | -4.9965450519 | 3.0217909778 | 2.5760983950  |
| C47 | -6.1573562723 | 2.4298972200 | 2.0626533739  |
| H48 | -6.0913090880 | 1.4143160918 | 1.6832954033  |
| C49 | -7.3746620171 | 3.1111645692 | 2.0214421340  |
| C50 | -7.4199839671 | 4.4286707685 | 2.4753173050  |
| H51 | -8.3351269753 | 5.0101380401 | 2.4063694860  |
| C52 | -6.2824824410 | 5.0000025979 | 3.0433360299  |
| C53 | 2.1920609529  | 0.5331533761 | 1.8560169762  |

|     |              |               |               |
|-----|--------------|---------------|---------------|
| H54 | 2.4923671629 | -0.4523947689 | 1.4844439856  |
| H55 | 1.1624986516 | 0.4859624972  | 2.2150958676  |
| H56 | 2.8503704416 | 0.8080674165  | 2.6855626119  |
| C57 | 4.0952726134 | 1.5665819156  | 0.0281205918  |
| H58 | 4.3177961475 | 0.5129776448  | -0.1704337077 |
| H59 | 4.7409059419 | 1.9236151883  | 0.8351546921  |
| H60 | 4.3132318429 | 2.1558350001  | -0.8661556049 |
| C61 | 1.4709560233 | 0.9159949161  | -0.8804198567 |
| H62 | 1.8498983615 | -0.1053974992 | -0.9912842790 |
| H63 | 1.6383810390 | 1.4634586507  | -1.8124009578 |
| H64 | 0.3970176043 | 0.8835332319  | -0.6823570384 |
| C65 | 3.7576743588 | 4.0119448241  | 3.9319162701  |
| H66 | 3.8361180365 | 4.0759015544  | 5.0223584018  |
| H67 | 4.4030128557 | 4.7708186220  | 3.4816562470  |
| H68 | 4.1115123663 | 3.0301947509  | 3.6055267551  |
| C69 | 1.1462750528 | 3.0270303405  | 4.4706668916  |
| H70 | 1.4676999442 | 3.1691749627  | 5.5078975822  |
| H71 | 1.3773771783 | 2.0062046982  | 4.1615191405  |
| H72 | 0.0659139297 | 3.1646818541  | 4.3975655570  |
| C73 | 1.5629646647 | 5.8020810000  | 4.3028747947  |
| H74 | 1.6677471161 | 5.6454403104  | 5.3815886149  |
| H75 | 0.5314043413 | 6.0786033766  | 4.0723313552  |
| H76 | 2.2057838850 | 6.6292253132  | 3.9988260198  |
| C77 | 4.7444843376 | 6.0574519211  | 0.1819175250  |
| H78 | 5.2579930385 | 6.9992713717  | -0.0382830175 |
| H79 | 4.9111287408 | 5.3564578291  | -0.6401252358 |
| H80 | 5.1692428674 | 5.6209844869  | 1.0898640487  |
| C81 | 2.5875550050 | 7.2691150740  | -1.1644729545 |
| H82 | 3.3581193050 | 8.0354363505  | -1.3016919905 |
| H83 | 1.6121534699 | 7.7522579443  | -1.1239491960 |
| H84 | 2.6031891967 | 6.5900549443  | -2.0202548990 |
| C85 | 2.9524104802 | 7.7416095850  | 1.6023244601  |
| H86 | 3.4382080972 | 8.6123557460  | 1.1495516272  |
| H87 | 3.5163868917 | 7.4593763408  | 2.4958102998  |

|      |               |               |              |
|------|---------------|---------------|--------------|
| H88  | 1.9310017311  | 7.9994590069  | 1.8872929833 |
| C89  | -4.2889481233 | 10.7311246122 | 6.1098791782 |
| H90  | -4.7819228337 | 11.7089001049 | 6.1230627666 |
| H91  | -3.5259984876 | 10.7224540060 | 5.3290900784 |
| H92  | -3.8143272383 | 10.5674595007 | 7.0818602907 |
| C93  | -6.7010235933 | 9.6833787005  | 7.1796760482 |
| H94  | -6.9998685123 | 10.7356371094 | 7.2284418342 |
| H95  | -6.2309392275 | 9.3990013978  | 8.1250374676 |
| H96  | -7.5904714052 | 9.0629770126  | 7.0430123796 |
| C97  | -6.4721590560 | 10.1266436687 | 4.3778479889 |
| H98  | -6.7668728721 | 11.1563483499 | 4.6062828257 |
| H99  | -7.3713406503 | 9.5323047654  | 4.1920946791 |
| H100 | -5.8545653843 | 10.1184000530 | 3.4774441393 |
| C101 | -2.7603341462 | 7.3201548413  | 8.6069698745 |
| H102 | -1.7710436660 | 7.3421616808  | 9.0762139784 |
| H103 | -3.3381310299 | 6.4958074155  | 9.0325472745 |
| H104 | -3.2845328053 | 8.2525153252  | 8.8336222418 |
| C105 | -1.4225347525 | 8.4946636563  | 6.3947350605 |
| H106 | -0.5241975432 | 8.3871663934  | 7.0116920203 |
| H107 | -1.8767346418 | 9.4660973911  | 6.5950279339 |
| H108 | -1.1456995086 | 8.4579100216  | 5.3387834373 |
| C109 | -1.4447678371 | 5.6936254303  | 6.6510398276 |
| H110 | -0.5126062742 | 5.9133678703  | 7.1827774032 |
| H111 | -1.2258503016 | 5.5000124843  | 5.5986663533 |
| H112 | -1.8923129599 | 4.7917611804  | 7.0698115209 |
| C113 | -6.7904003337 | 3.7563976792  | 6.0197070092 |
| H114 | -7.1355846312 | 3.0441840492  | 6.7768278582 |
| H115 | -6.3237464056 | 3.2061864741  | 5.2024338765 |
| H116 | -7.6501793781 | 4.3016801815  | 5.6245629673 |
| C117 | -6.5200213435 | 5.3435893937  | 8.3365138583 |
| H118 | -6.8349608883 | 4.4332395442  | 8.8573609069 |
| H119 | -7.4034471197 | 5.9336459422  | 8.0790720973 |
| H120 | -5.8967849874 | 5.9428367032  | 9.0053902298 |
| C121 | -4.3617940541 | 3.7120927068  | 7.4632669774 |



|      |               |              |               |
|------|---------------|--------------|---------------|
| H122 | -4.8863588892 | 2.8664984220 | 7.9202967683  |
| H123 | -3.7340330335 | 4.1816572085 | 8.2255976686  |
| H124 | -3.7306830432 | 3.3492774357 | 6.6496757683  |
| H125 | -4.3343427165 | 2.9315630599 | -2.3881107888 |
| H126 | -8.2616434898 | 2.6320973068 | 1.6178340149  |
| H127 | -6.1425619809 | 7.7062979563 | -1.2280813092 |
| H128 | -1.1324939791 | 8.1366986832 | -3.8926059214 |

*anti*-[(S<sub>4</sub>Calix<sup>H</sup>(S)<sub>4</sub>][W(PMe<sub>3</sub>)<sub>3</sub>H<sub>2</sub>]<sub>2</sub>  
 -7012.17714580913 Hartrees (B3YLP/6-31G\*\* and LACVP)

| atom | x             | y             | z             |
|------|---------------|---------------|---------------|
| W1   | -2.3849312860 | 2.9788863696  | 1.0221263284  |
| H2   | -3.2118466259 | 3.9477524182  | 2.1743692170  |
| H3   | -3.4159969410 | 4.1628695744  | 0.3292912766  |
| S4   | -2.3980681645 | 0.4392849392  | 0.8910625178  |
| S5   | 0.1393476795  | 2.6813922833  | 0.8505273930  |
| S6   | -2.1676696763 | 2.6663231902  | -1.4701335757 |
| S7   | -3.2998638515 | -2.6357734545 | 0.0886556506  |
| P8   | -1.9172476959 | 2.3693519329  | 3.4154606334  |
| P9   | -4.8757043252 | 2.4291254731  | 0.9503139491  |
| P10  | -1.4644151529 | 5.3425117246  | 0.9816569835  |
| C11  | -2.6671122740 | -0.0010777560 | -0.7824028308 |
| C12  | -3.0230829814 | -1.3344580461 | -1.1215632512 |
| C13  | -3.3127048952 | -1.6737322490 | -2.4465330106 |
| H14  | -3.5766502552 | -2.7027011756 | -2.6738617194 |
| C15  | -3.2683813903 | -0.7200495924 | -3.4646651354 |
| C16  | -2.8991761408 | 0.5892564347  | -3.1543181845 |
| H17  | -2.8600349585 | 1.3472532712  | -3.9311518957 |
| C18  | -2.5844577573 | 0.9312412235  | -1.8380926312 |
| C19  | 0.5615627970  | 2.6640836228  | -0.8527862419 |
| C20  | -0.3995442681 | 2.7083503753  | -1.8846230795 |
| C21  | -0.0423115887 | 2.8541352326  | -3.2270827643 |
| H22  | -0.8175539042 | 2.9278453241  | -3.9840992224 |
| C23  | 1.3030210627  | 2.9033062603  | -3.5889225437 |

|     |               |              |               |
|-----|---------------|--------------|---------------|
| C24 | 2.2762645357  | 2.7827709590 | -2.5957587796 |
| H25 | 3.3292791909  | 2.7754861088 | -2.8623333843 |
| C26 | 1.9268238271  | 2.6599047346 | -1.2484400412 |
| C27 | -1.3199986465 | 3.6926163178 | 4.5664259170  |
| H28 | -1.2422453609 | 3.3099001323 | 5.5894493799  |
| H29 | -2.0076352394 | 4.5424527654 | 4.5531251756  |
| H30 | -0.3338616296 | 4.0317400164 | 4.2425781322  |
| C31 | -3.3300246522 | 1.6892757882 | 4.4042167897  |
| H32 | -3.0229832579 | 1.4848256557 | 5.4355903731  |
| H33 | -3.6654300745 | 0.7581926774 | 3.9427500790  |
| H34 | -4.1597851325 | 2.4013630428 | 4.4133001460  |
| C35 | -0.6457402673 | 1.0620732122 | 3.7351496649  |
| H36 | -0.5567543712 | 0.8893265482 | 4.8136456927  |
| H37 | 0.3215060249  | 1.3697054542 | 3.3338506854  |
| H38 | -0.9327785266 | 0.1323066752 | 3.2410168721  |
| C39 | -5.9676902762 | 3.7747782698 | 1.6156116613  |
| H40 | -7.0265656684 | 3.5381822815 | 1.4676721826  |
| H41 | -5.7338832484 | 4.7144710998 | 1.1092382236  |
| H42 | -5.7760616194 | 3.9088038828 | 2.6838792575  |
| C43 | -5.5880468170 | 2.2612664033 | -0.7570162126 |
| H44 | -6.6801718939 | 2.1876743317 | -0.7177411305 |
| H45 | -5.1896909763 | 1.3673810895 | -1.2407917523 |
| H46 | -5.3082854375 | 3.1324856446 | -1.3557046697 |
| C47 | -5.6633613321 | 0.9522260672 | 1.7546863759  |
| H48 | -6.7189807820 | 0.8932271097 | 1.4694166449  |
| H49 | -5.5998525023 | 1.0376495898 | 2.8414512709  |
| H50 | -5.1467278364 | 0.0424762937 | 1.4450506897  |
| C51 | -0.0411214339 | 5.9058665579 | 2.0345689408  |
| H52 | 0.2831120434  | 6.9051593632 | 1.7258184020  |
| H53 | 0.7889276093  | 5.2052139709 | 1.9287977544  |
| H54 | -0.3478059458 | 5.9478553762 | 3.0822546201  |
| C55 | -0.9045010895 | 5.9563732954 | -0.6760413124 |
| H56 | -0.6386135464 | 7.0176853805 | -0.6306508077 |
| H57 | -1.7086801583 | 5.8190806117 | -1.4042909334 |

|     |               |               |               |
|-----|---------------|---------------|---------------|
| H58 | -0.0360500312 | 5.3838821222  | -1.0070558940 |
| C59 | -2.7033173803 | 6.6587989046  | 1.4105206903  |
| H60 | -2.2637173498 | 7.6589086068  | 1.3349342864  |
| H61 | -3.0652326880 | 6.5019037808  | 2.4303353768  |
| H62 | -3.5578381962 | 6.5903543840  | 0.7323319481  |
| S63 | 2.3980681645  | -0.4392849392 | -0.8910625178 |
| S64 | -0.1393476795 | -2.6813922833 | -0.8505273930 |
| S65 | 2.1676696763  | -2.6663231902 | 1.4701335757  |
| S66 | 3.2998638515  | 2.6357734545  | -0.0886556506 |
| C67 | 2.6671122740  | 0.0010777560  | 0.7824028308  |
| C68 | 3.0230829814  | 1.3344580461  | 1.1215632512  |
| C69 | 3.3127048952  | 1.6737322490  | 2.4465330106  |
| H70 | 3.5766502552  | 2.7027011756  | 2.6738617194  |
| C71 | 3.2683813903  | 0.7200495924  | 3.4646651354  |
| C72 | 2.8991761408  | -0.5892564347 | 3.1543181845  |
| H73 | 2.8600349585  | -1.3472532712 | 3.9311518957  |
| C74 | 2.5844577573  | -0.9312412235 | 1.8380926312  |
| C75 | -0.5615627970 | -2.6640836228 | 0.8527862419  |
| C76 | 0.3995442681  | -2.7083503753 | 1.8846230795  |
| C77 | 0.0423115887  | -2.8541352326 | 3.2270827643  |
| H78 | 0.8175539042  | -2.9278453241 | 3.9840992224  |
| C79 | -1.3030210627 | -2.9033062603 | 3.5889225437  |
| C80 | -2.2762645357 | -2.7827709590 | 2.5957587796  |
| H81 | -3.3292791909 | -2.7754861088 | 2.8623333843  |
| C82 | -1.9268238271 | -2.6599047346 | 1.2484400412  |
| W83 | 2.3849312860  | -2.9788863696 | -1.0221263284 |
| H84 | 3.2118466259  | -3.9477524182 | -2.1743692170 |
| H85 | 3.4159969410  | -4.1628695744 | -0.3292912766 |
| P86 | 1.9172476959  | -2.3693519329 | -3.4154606334 |
| P87 | 4.8757043252  | -2.4291254731 | -0.9503139491 |
| P88 | 1.4644151529  | -5.3425117246 | -0.9816569835 |
| C89 | 1.3199986465  | -3.6926163178 | -4.5664259170 |
| H90 | 1.2422453609  | -3.3099001323 | -5.5894493799 |
| H91 | 2.0076352394  | -4.5424527654 | -4.5531251756 |

|      |               |               |               |
|------|---------------|---------------|---------------|
| H92  | 0.3338616296  | -4.0317400164 | -4.2425781322 |
| C93  | 3.3300246522  | -1.6892757882 | -4.4042167897 |
| H94  | 3.0229832579  | -1.4848256557 | -5.4355903731 |
| H95  | 3.6654300745  | -0.7581926774 | -3.9427500790 |
| H96  | 4.1597851325  | -2.4013630428 | -4.4133001460 |
| C97  | 0.6457402673  | -1.0620732122 | -3.7351496649 |
| H98  | 0.5567543712  | -0.8893265482 | -4.8136456927 |
| H99  | -0.3215060249 | -1.3697054542 | -3.3338506854 |
| H100 | 0.9327785266  | -0.1323066752 | -3.2410168721 |
| C101 | 5.9676902762  | -3.7747782698 | -1.6156116613 |
| H102 | 7.0265656684  | -3.5381822815 | -1.4676721826 |
| H103 | 5.7338832484  | -4.7144710998 | -1.1092382236 |
| H104 | 5.7760616194  | -3.9088038828 | -2.6838792575 |
| C105 | 5.5880468170  | -2.2612664033 | 0.7570162126  |
| H106 | 6.6801718939  | -2.1876743317 | 0.7177411305  |
| H107 | 5.1896909763  | -1.3673810895 | 1.2407917523  |
| H108 | 5.3082854375  | -3.1324856446 | 1.3557046697  |
| C109 | 5.6633613321  | -0.9522260672 | -1.7546863759 |
| H110 | 6.7189807820  | -0.8932271097 | -1.4694166449 |
| H111 | 5.5998525023  | -1.0376495898 | -2.8414512709 |
| H112 | 5.1467278364  | -0.0424762937 | -1.4450506897 |
| C113 | 0.0411214339  | -5.9058665579 | -2.0345689408 |
| H114 | -0.2831120434 | -6.9051593632 | -1.7258184020 |
| H115 | -0.7889276093 | -5.2052139709 | -1.9287977544 |
| H116 | 0.3478059458  | -5.9478553762 | -3.0822546201 |
| C117 | 0.9045010895  | -5.9563732954 | 0.6760413124  |
| H118 | 0.6386135464  | -7.0176853805 | 0.6306508077  |
| H119 | 1.7086801583  | -5.8190806117 | 1.4042909334  |
| H120 | 0.0360500312  | -5.3838821222 | 1.0070558940  |
| C121 | 2.7033173803  | -6.6587989046 | -1.4105206903 |
| H122 | 2.2637173498  | -7.6589086068 | -1.3349342864 |
| H123 | 3.0652326880  | -6.5019037808 | -2.4303353768 |
| H124 | 3.5578381962  | -6.5903543840 | -0.7323319481 |
| H125 | -3.5155233917 | -0.9949267081 | -4.4858531642 |

|      |               |               |               |
|------|---------------|---------------|---------------|
| H126 | 1.5900637437  | 3.0171715947  | -4.6300206732 |
| H127 | 3.5155233917  | 0.9949267081  | 4.4858531642  |
| H128 | -1.5900637437 | -3.0171715947 | 4.6300206732  |

## References

- (1) (a) McNally, J. P.; Leong, V. S.; Cooper, N. J. in *Experimental Organometallic Chemistry*, Wayda, A. L.; Darensbourg, M. Y., Eds.; American Chemical Society: Washington, DC, 1987; Chapter 2, pp 6-23.  
(b) Burger, B.J.; Bercaw, J. E. in *Experimental Organometallic Chemistry*; Wayda, A. L.; Darensbourg, M. Y., Eds.; American Chemical Society: Washington, DC, 1987; Chapter 4, pp 79-98.  
(c) Shriver, D. F.; Drezdson, M. A.; *The Manipulation of Air-Sensitive Compounds*, 2<sup>nd</sup> Edition; Wiley-Interscience: New York, 1986.
- (2) Gottlieb, H. E.; Kotlyar, V.; Nudelman, A. J. *Org. Chem.* **1997**, *62*, 7512-7515.
- (3) Murphy, V. J.; Parkin, G. J. *Am. Chem. Soc.* **1995**, *117*, 3522-3528.
- (4) Green, M. L. H.; Parkin, G.; Chen, M.; Prout, K. J. *Chem. Soc., Dalton Trans.* **1986**, 2227-2236.
- (5) Klein, H.-F.; Schmidbaur, H. *Angew. Chem. Int. Ed. Engl.* **1970**, *9*, 903-904.
- (6) Akdas, H.; Graf, E.; Hosseini, M. W.; Rao, P.; De Cian, A. J. *Supramol. Chem.* **2002**, *2*, 21-28.
- (7) Clever, H. L. in *Solubility Data Series*, Young, C. L., Ed.; Pergamon Press: Oxford, 1981; Volume 5/6: pp 159-168.
- (8) (a) Sheldrick, G. M. SHELXTL, An Integrated System for Solving, Refining and Displaying Crystal Structures from Diffraction Data; University of Göttingen, Göttingen, Federal Republic of Germany, 1981.  
(b) Sheldrick, G. M. *Acta Cryst.* **2008**, *A64*, 112-122.
- (9) Jaguar 7.0, Schrödinger, LLC, New York, NY 2007.
- (10) (a) Becke, A. D. *J. Chem. Phys.* **1993**, *98*, 5648-5652.  
(b) Becke, A. D. *Phys. Rev. A* **1988**, *38*, 3098-3100.  
(c) Lee, C. T.; Yang, W. T.; Parr, R. G. *Phys. Rev. B* **1988**, *37*, 785-789.  
(d) Vosko, S. H.; Wilk, L.; Nusair, M. *Can. J. Phys.* **1980**, *58*, 1200-1211.

- (e) Slater, J. C. *Quantum Theory of Molecules and Solids, Vol. 4: The Self-Consistent Field for Molecules and Solids*; McGraw-Hill: New York, 1974.
- (11) (a) Hay, P. J.; Wadt, W. R. *J. Chem. Phys.* **1985**, *82*, 270–283.
- (b) Wadt, W. R.; Hay, P. J. *J. Chem. Phys.* **1985**, *82*, 284–298.
- (c) Hay, P. J.; Wadt, W. R. *J. Chem. Phys.* **1985**, *82*, 299–310.
